# The language oscillogenome

Elliot Murphy<sup>1</sup> and Antonio Benítez-Burraco<sup>2</sup>

1. Division of Psychology and Language Sciences, University College London, London, UK

2. Faculty of Philology, University of Huelva, Huelva, Spain

**Abstract:** Language has been argued to arise, both ontogenetically and phylogenetically, from specific patterns of brain wiring. In particular, it can be shown that core features of language processing emerge from particular phasal and cross-frequency coupling properties of neural oscillations; what has been referred to as the language ‘oscillome’. It is expected that basic aspects of the language oscillome result from genetic guidance, what we will here call the language ‘oscillogenome’, for which we will put forward a list of candidate genes. We have considered genes for altered brain rhythmicity in conditions involving language deficits (autism spectrum disorders, schizophrenia, specific language impairment and dyslexia) for which we have confident genome-oscillome-phenome connections. These selected genes map on to aspects of brain function, particularly on to neurotransmitter function. Our aim is to provide biologically robust genome-to-language links that grant causal and explanatory power to brain rhythms with respect to language processing.

**Keywords:** Autism spectrum disorders; schizophrenia; specific language impairment; dyslexia; neural oscillations; candidate genes; language deficits

## 1. Introduction

Which genes regulate mental processes? This is surely one of the most pivotal questions in contemporary neurobiology. In their Foreword to a recent volume on birdsong and biolinguistics, Berwick and Chomsky (2015: x) discuss the potential for one particular gene, *FoxP2*, to contribute to debates about the evolution of our most complex mental capacity, language, commenting that ‘[h]ow far one can drive this genomic work upward into neuronal assemblies – ultimately, the dissection of the underlying circuitry responsible for vocal production – remains to be seen’.

The present paper will serve as the next step in this biolinguistic approach to language, documenting the genes implicated in oscillatory activity during language processing as a means of establishing robust, causal genome-oscillome linking hypotheses. As is standard in candidate-gene approach studies, we have examined cognitive conditions entailing both language deficits and oscillatory anomalies as a way to identify promising candidates. We have focused on schizophrenia (SZ) and autism spectrum disorders (ASD), which entail language impairment mostly at the syntax-semantics interface, and also on specific language impairment (SLI) and developmental dyslexia (DD), which entail language impairment mostly at the syntax-phonology interface. For a proposal of how to explain these deficits in oscillatory terms, see Benítez-Burraco and Murphy (2016), Murphy and Benítez-Burraco (2016), and Jiménez-Bravo et al. (2017). At the core of these proposals is the assumption that particular computational and representational properties can be attributed to neural oscillations. This continues a recent line of research which has drawn the following conclusions: Computational operations of language can be decomposed into generic processes (Murphy 2015a); these generic processes interact in dynamic ways and can be implemented via neural oscillations (Murphy 2015b); these oscillations implement a multiplexing algorithm for the combination and interpretation of linguistic representations (Murphy 2016a); this multiplexing algorithm appears to be species-specific (Murphy 2016b). The long-standing conclusions concerning the

species-specificity of language therefore come full circle through a human-specific oscillatory code. What we have argued is that, in essence, although most of the nerve tracks and regions which differ in these pathological conditions are implicated in language processing, neural oscillations provide a more reliable explanatory level of the language deficits exhibited by the affected populations. Moving beyond this now requires an examination of the genes responsible for the brain's oscillatory behavior.

The genetic basis of neural oscillations more broadly likely stems from regulatory genes controlling the brain's neurochemistry (Begleiter and Porjesz 2006). Oscillations represent highly heritable traits (van Beijsterveldt et al. 1996, Linkenkaer-Hansen et al. 2007, Hall et al. 2011) that are an interesting combination of being less complex but more proximal to gene function than standard cognitive or diagnostic labels. In what follows, we first provide a functional characterization of candidate genes for the language oscillogenome, with a focus on their biological significance and functions. We then discuss the contribution of these genes to language processing, and sketch genome-to-oscillome-to-language links. With this aim, we will consider the brain areas in which they are expressed, the brain rhythms they have been related to, and the role of these areas and rhythms in language processing. Our goal is to understand how these genes contribute to language processing and how mutations in these genes result in language impairments, with a focus on normal or abnormal oscillatory activity. We conclude with a brief discussion concerning future perspectives for finding more robust links between genes, brain rhythms, and language.

## 2. A draft of the language oscillogenome

In order to achieve our objective of drafting the language oscillogenome, we first gathered via systematic literature review and database searches an extended list of genes that are associated with SZ, ASD, DD, and/or SLI, and that are additionally known to play a role in brain rhythmicity and/or are candidates for conditions entailing brain dysrhythmias, like epilepsy. As noted in the introduction, we have chosen these four clinical conditions because of two main reasons. First, we have already improved robust characterizations of their linguistic profile in terms of an abnormal suite of brain rhythms. Second, language impairment in these conditions relate to core aspects of language (and of language processing in the brain), in particular, to the interface between syntax and semantics, and between syntax and phonology.

For SZ we have mostly relied on the Schizophrenia Database (<http://www.szdb.org>), which currently includes 2689 genes with different levels of evidence: genes resulting from genome-wide analyses (GWA) and copy number variant (CNV)/exome sequencing analyses, genes showing altered methylation patterns in schizophrenics, genes resulting from functional studies or candidate gene approaches, genes with pathogenic single nucleotide polymorphisms (SNPs), and genes found mutated in familial forms of the disease. Within these genes, we have focused on those that have been found to play a role in language development (and potentially evolution), as discussed in Murphy and Benítez-Burraco (2016). For ASD we have relied mostly on the SFARI database (<https://sfari.org>), which currently includes 859 genes and ~300 potential candidates for the disorder, based on different levels of evidence (genes bearing rare single variants, disruptions/mutations, or submicroscopic deletions/duplications; candidates resulting from genetic association studies, particularly, GWAs; genes resulting from functional approaches; and genes with CNV associated with ASD). Within these genes, we have equally focused on those highlighted in Benítez-Burraco and Murphy (2016) as important for language development and evolution. For DD, we have relied on the last updated list of candidates for this condition, as provided by Paracchini et al (2016), which includes genes resulting from

candidate association studies and GWAs. Finally, for SLI, we have relied on the literature review provided by Chen et al. (2016) and on the literature survey and results provided by Pettigrew et al (2016).

Our list of potential candidates for these language oscillophenomes is shown in Table 1.

Table 1. The set of candidates comprising the language oscillophenome

|                 | <b>SZ</b> | <b>ASD</b> | <b>Dyslexia</b> | <b>SLI</b> |
|-----------------|-----------|------------|-----------------|------------|
| <i>AUTS2</i>    | +         |            |                 | +          |
| <i>CACNA1C</i>  | +         | +          |                 |            |
| <i>CACNA1H</i>  | +         | +          |                 |            |
| <i>CNR1</i>     | +         | +          |                 |            |
| <i>CNTNAP2</i>  | +         | +          |                 |            |
| <i>COL4A2</i>   |           |            | +               |            |
| <i>COMT</i>     | +         | +          |                 |            |
| <i>CX3CR1</i>   | +         | +          |                 |            |
| <i>CYP19A1</i>  |           |            | +               |            |
| <i>DCDC2</i>    |           |            | +               |            |
| <i>DISC1</i>    | +         | +          |                 |            |
| <i>DLX5</i>     | +         | +          |                 |            |
| <i>DLX6</i>     | +         | +          |                 |            |
| <i>DPP10</i>    | +         | +          |                 |            |
| <i>DYRK1A</i>   |           | +          |                 |            |
| <i>EGR1</i>     | +         |            |                 |            |
| <i>ELP4</i>     |           | +          |                 |            |
| <i>ERBB4</i>    | +         | +          |                 |            |
| <i>FMR1</i>     | +         | +          |                 |            |
| <i>FOXP1</i>    | +         | +          |                 | +          |
| <i>GABARAP</i>  |           |            | +               |            |
| <i>GABRB3</i>   | +         | +          |                 |            |
| <i>GAD1</i>     | +         | +          |                 |            |
| <i>GRIN2A</i>   | +         | +          |                 | +          |
| <i>GRIN2B</i>   | +         | +          |                 | +          |
| <i>GRM8</i>     | +         | +          |                 |            |
| <i>HTR1A</i>    | +         |            |                 |            |
| <i>KANSL1</i>   |           |            | +               |            |
| <i>KIAA0319</i> |           |            | +               |            |
| <i>MAPK14</i>   | +         |            |                 |            |
| <i>MBD5</i>     | +         | +          |                 | +          |
| <i>MECP2</i>    | +         | +          |                 |            |
| <i>NRG1</i>     | +         | +          |                 |            |
| <i>NSF</i>      |           |            | +               |            |
| <i>PDGFRB</i>   | +         | +          |                 |            |
| <i>PLAUR</i>    |           | +          |                 | +          |
| <i>PTEN</i>     |           | +          |                 |            |
| <i>ROBO1</i>    | +         | +          | +               |            |
| <i>SI00B</i>    | +         |            | +               |            |
| <i>SCN1A</i>    |           | +          |                 |            |
| <i>SETBP1</i>   |           | +          |                 | +          |
| <i>SHANK3</i>   | +         | +          |                 |            |

|                |   |   |   |   |
|----------------|---|---|---|---|
| <i>SIRT1</i>   | + |   |   |   |
| <i>SNAP25</i>  | + | + | + |   |
| <i>SRPX2</i>   |   |   |   | + |
| <i>ZNF804A</i> | + | + |   |   |

We expected that the 46 genes we highlight here as part of the shared signature of abnormal brain oscillations associated with language deficits are functionally interconnected and map on to specific regulatory pathways, cell types or functions, or aspects of brain development of interest for language and the etiopathogenesis of language impairment in the clinical conditions we have mentioned. Accordingly, we used String 10 ([www.string-db.org](http://www.string-db.org)) for examining potential functional links among the proteins encoded by our candidates. String 10 predicts direct/physical and indirect/functional associations between proteins that derive from four sources: genomic context, high-throughput experiments, conserved coexpression, and the knowledge previously gained from text mining (Szklarczyk et al. 2015). As shown in Figure 1, several proteins (NRG1, ERBB4, PDGFRB, EGR1, MAP14, DISC1, SIRT1, DYRK1A, PLAUR, and SRPX2) are found reciprocally interconnected, hence displayed in the central part of the network. These proteins are indeed involved in different steps of neural development and function, particularly in brain oscillatory activity.

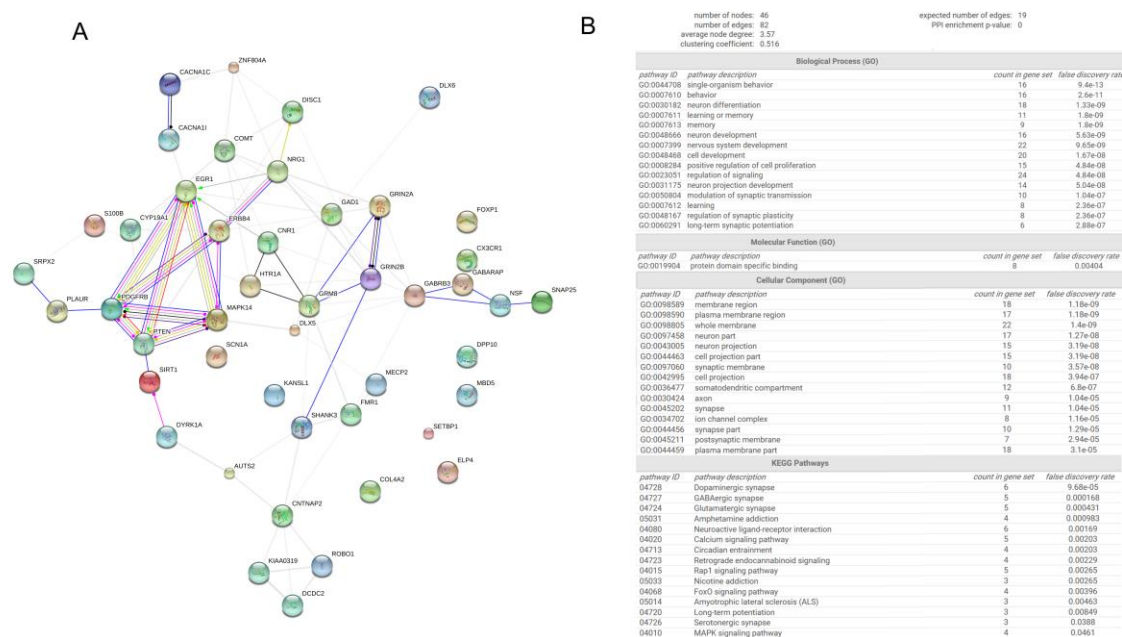

**Figure 1. Protein interaction network.** The diagram on the left shows the network of known and predicted interactions among proteins encoded by genes proposed as candidates for the language oscillogenome (Table 1). The network was drawn with String (version 10.0; Szklarczyk et al., 2015)) license-free software (<http://string-db.org/>), using the molecular action visualization. Colored nodes symbolize gene/proteins included in the query (small nodes are for proteins with unknown 3D structure, while large nodes are for those with known structures). The color of the edges represent different kind of known protein-protein associations. Green: activation, red: inhibition, dark blue: binding, light blue: phenotype, dark purple: catalysis, light purple: post-translational modification, black: reaction, yellow: transcriptional regulation. Edges ending in an arrow symbolize positive effects, edges ending in a bar symbolize negative effects, whereas edges ending in a circle symbolize unspecified effects. Grey edges symbolize predicted links based on literature search (co-mentioned in PubMed abstracts). Stronger

associations between proteins are represented by thicker lines. The medium confidence value was .0400 (a 40% probability that a predicted link exists between two enzymes in the same metabolic map in the KEGG database: <http://www.genome.jp/kegg/pathway.html>). The diagram only represents the potential connectivity between the involved proteins, which has to be mapped onto particular biochemical networks, signaling pathways, cellular properties, aspects of neuronal function, or cell-types of interest (see the main text for details). Functional enrichment of the entire gene set, according to Gene Ontology (GO) consortium annotations, is shown on the right side of the image. This enrichment was performed using String algorithm for gene network analysis. A false-discovery rate cutoff of 0.05, obtained after Bonferroni correction, was set to select significant functions. Except for the “molecular function” annotation, only the top fifteen scoring categories are displayed.

NRG1 contributes to the regulation of neural proliferation in the subventricular zone (Ghashghaei et al. 2006), thalamocortical axon pathfinding (López-Bendito et al. 2006), and glutamatergic and dopaminergic neurotransmission in the thalamus and the striatum (Newell et al. 2013). NRG1 and its receptor ERBB4 regulate as well the migration of GABAergic interneurons from ganglionic eminences to their cortical destinations (Li et al. 2012). Additionally, they play a key role in synchronizing neural oscillations in the cortex. Specifically, they enhance the synchrony of pyramidal neurons via presynaptic interneurons, increase the synchrony between pairs of fast-spiking interneurons and pairs of fast-spiking and non-fast-spiking interneurons in the prefrontal cortex, and enhance kainate-induced gamma oscillations in vivo (Hou et al. 2014). Risk alleles of *NRG1* have been found to correlate with semantic (but not to lexical) verbal fluency in SZ, and with a decreased activation in the left inferior frontal and the right middle temporal gyri as well as the anterior cingulate gyrus of schizophrenic patients (Kircher et al. 2009), but also with reduced left superior temporal gyrus volumes (a robust imaging finding in SZ) (Tosato et al. 2012). Risk polymorphisms of the gene are associated as well with increased IQs, memory, learning performance, and language abilities in subjects with bipolar disorder (Rolstad et al. 2015). Interestingly too, *Nrg1*(+/-) mice exhibit decreased social activity which mimic the social deficits observed in autistic patients (Ehrlichman et al., 2009).

Signalling by NRG1 has been found to increase the expression of an isoform of DISC1, encoded by a robust SZ candidate, during neurodevelopment (Seshadri et al. 2010). DISC1 is involved in neurite outgrowth, cortical development, and callosal formation (Brandon and Sawa 2011; Osburn et al. 2011).  $\theta$ -induced long-term potentiation is altered in the hippocampal area CA1 of transgenic mice expressing a truncated version of *Disc1* (Booth et al. 2014). Moreover, the inhibitory effect of DISC1 on NRG1-induced ERBB4 activation and signalling also affects the spiking interneuron-pyramidal neuron circuit (Seshadri et al. 2015).

Several other robust candidates for SZ are predicted to be functionally linked to DISC1 and/or NRG1, including CACNA1C, CACNA1I, COMT, and ZNF804A. All of these are known to impact oscillatory patterns. *CACNA1I* and *CACNA1C* encode different subunits of calcium channels. *CACNA1C* encodes the alpha 1C subunit of the Cav1.2 voltage-dependent L-type calcium channel, which contributes to the generation of  $\beta$  and  $\gamma$  waves during wakefulness and REM sleep (Kumar et al. 2015). Risk alleles of the gene correlate with lower performance scores in semantic verbal fluency tasks in schizophrenics (Krug et al. 2010). Pathogenic variants of *CACNA1C* have been identified in subjects with intellectual disability, executive dysfunction, hyperactivity-impulsivity that interferes with Attention-Deficit/Hyperactivity Disorder (ADHD) and/or ASD, as well as forms of childhood-onset epilepsy (Damaj et al. 2015). *CACNA1I* has been related to changes in sleep spindles in schizophrenics, a type of brain rhythm that constrains aspects of the thalamocortical crosstalk, impacting on memory consolidation and learning (Manoach et al. 2015). Likewise, low voltage  $\alpha$  has been associated



with low activity levels in COMT (Enoch et al. 2003). Finally, ZNF804A modulates hippocampal  $\gamma$  oscillations and thus, the coordination of hippocampal and prefrontal distributed networks (Cousijn et al. 2015). It also contributes to cortical functioning and neural connectivity, because of its known role in growth cone function and neurite elongation (Hinna et al. 2015). SZ risk polymorphisms of *ZNF804A* result in lower performance scores in reading and spelling tasks (Becker et al. 2012), but also in task evaluating category fluency during semantic processing (Nicodemus et al. 2014). ASNP within intron 2 of the gene has been found to be associated with ASD subjects that are verbally deficient (Anitha et al. 2012).

Concerning *ERBB4*, this gene has been related to intellectual disability and speech delay (Kasnauskiene et al. 2013). *ERBB4* is predicted to interact with PDGFRB, and putative homologs of these two genes have been found to interact in other species, particularly in *Drosophila melanogaster* and *Caenorhabditis elegans* (Figure 1). In human cells, a direct interaction of PDGFRB and one of the functional isoforms of *ERBB4* has been recently documented (Sundwall et al 2010). *PDGFRB* encodes the  $\beta$  subunit of the platelet-derived growth factor (PDGF) receptor, known to be involved in the development of the central nervous system. In mice, the knockout of *Pdgfrb* results in reduced auditory phase-locked  $\gamma$  oscillations, which correlates with anatomical, physiological, and behavioural anomalies that are also found in schizophrenics, including reduced density of GABAergic neurons in the amygdala, hippocampus, and medial prefrontal cortex; alterations of prepulse inhibition; reduced social behaviour; impaired spatial memory; and problems with conditioning (Nguyen et al. 2011, Nakamura et al. 2015).

*ERBB4* is also a functional partner of PTEN, a phosphatase that preferentially dephosphorylates phosphoinositide substrates. Both proteins collaborate in protrusion formation in rhombic lip cells (Sakakibara and Horwitz, 2006). Functional interactions are predicted as well between PTEN and PDGFRB (Figure 1). *PTEN* is a candidate for a subtype of ASD with macrocephaly which is usually present in conjunction with epilepsy (or paroxysmal EEG) (Buxbaum et al. 2007; Marchese et al. 2014). The gene is highlighted as a candidate for language deficits in ASD, because patients with PTEN-associated ASD show delayed language development with poor working memory and processing speed (Naqvi et al. 2000, Tilot et al. 2015). PTEN is a major negative regulator of the mTOR signalling pathway, important for synaptic plasticity and neuronal cytoarchitecture (see Tilot et al. 2015 for review). The knockdown of *Pten* in mouse primary neuron cultures affects the expression of genes mapping to pathways associated with neurogenesis, long-term potentiation, and synaptic activity (Lanz et al. 2013). In mice, the deletion of *Pten* in adult hippocampal neural stem cells increases proliferation and differentiation of stem cells toward hypertrophied neurons with abnormal polarity, causes seizures and macrocephaly, and impairs social behaviour (Amiri et al. 2012). Social dysfunction in mouse models of neural *Pten* loss includes repetitive behaviour, impaired emotional learning (in females) and increased anxiety (in males) (Page et al. 2009, Clipperton-Allen and Page 2014), but also seizures and epileptiform features (Ogawa et al. 2007). Interestingly, *Pten* deletion in mice ultimately yields deviant circuit formation in the dentate gyrus, responsible for excitation flow through the hippocampus (Pun et al. 2012), potentially impairing procedural memory capacities relevant to language.

PTEN is a strong partner of MAPK14, which is also functionally related to *ERBB4* and PDGFRB (Figure 1). In glioma cells, the downregulation of *MAPK14* correlates with the upregulation of *PTEN*, resulting in the inhibition of cell migration in vitro (Dasari et al. 2010). Mice with a single copy disruption of *Mapk14* show protection against kainite-induced seizures (Namiki et al. 2007). Another partner of PTEN is SIRT1, which regulates

negatively neurogenesis and neural differentiation, contributes to axon formation and elongation, and plays a role in memory formation (Gao et al. 2010, Li et al. 2013, Saharan et al. 2013). *Sirt1* is negatively related to seizures and seizure-induced damage in the hippocampus of rat models of epilepsy via miR activity (Wang et al. 2016). SIRT1 phosphorylation and activation by DYRK1A promotes cell survival (Guo et al. 2010). *DYRK1A* is located within the Down Syndrome Critical Region within chromosome 21. In mice, *Dyrk1a* has proven to contribute to the balance between cortical and thalamic neurons (Guedj et al. 2012). *Dyrk1a* overexpression affects the expression of genes encoding GABAergic and glutamatergic related proteins, shifts the excitation/inhibition balance towards inhibition, and impacts on pathways involved in synaptogenesis and synaptic plasticity (Souchet et al. 2014), supporting a role of this gene in learning and memory (Hämmerle et al. 2003). *DYRK1A* has been related as well to microcephaly, facial dysmorphisms, mental retardation, and absence of speech (Van Bon et al. 2011, Courcet et al. 2012). In mice, the upregulation of *Dyrk1a* also results in the upregulation of *Gad1* (Souchet et al. 2014), which encodes an enzyme that catalyzes the production of GABA, with a specific role in the development of GABAergic neurons in the hippocampus (Pleasure et al. 2000). *GAD1* has been implicated in the pathophysiology of SZ, but also in working memory impairment, because of its impact on prefrontal white matter structure (Lett et al. 2016). Risk alleles of the gene impact as well on long-interval cortical inhibition (LICI) in the dorsolateral prefrontal cortex of schizophrenics, as showed by transcranial magnetic stimulation with electroencephalography (TMS-EEG): this suggests that the gene contributes to GABAergic inhibitory neurotransmission (Lett et al. 2016). Male *Gad1* (+/-) mice exhibit impaired social behavior (Sandhu et al., 2014).

*GAD1* interacts with *DLX5* and *DLX6*, two important genes for GABAergic interneuron development (Cobos et al. 2006; Ghanem et al. 2008; Poitras et al. 2010). Accordingly, in the developing ventral forebrain, the non-coding RNA *Evf2* controls transcription of *Gad1*, *Dlx5*, and *Dlx6* through trans and cis-acting mechanisms; *Evf2* mouse mutants exhibit reduced synaptic inhibition (Bond et al. 2009). Heterozygous mice for *Dlx5/6* exhibit reduced cognitive flexibility which appears to emerge from abnormal GABAergic interneurons and  $\gamma$  rhythms, particularly in fast-spiking interneurons (Cho et al. 2015), potentially contributing to the irregular long-lasting prefrontal and central  $\gamma$  in ASD, but also to SZ symptoms. *Evf2* also recruits *Mecp2* to DNA regulatory elements in the *Dlx5/6* intergenic region (Bond et al. 2009), whereas *DLX5* has been reported to be modulated by *MECP2* (Miyano et al. 2008). *MECP2* is the main candidate for Rett syndrome, a neurodegenerative condition involving autistic behaviour, motor problems, and language loss (Uchino et al. 2001, Veenstra-VanderWeele and Cook 2004). *MECP2* is critical for normal function of GABA-releasing neurons (Chao et al. 2010). In mice, the loss of *Mecp2* from GABAergic interneurons results in auditory event-related potential deficits (Goffinet et al. 2014). In response to auditory stimulation, *Mecp2*<sup>+/-</sup> mice recapitulate select  $\gamma$  and  $\beta$  band abnormalities and specific latency differences found in ASD subjects (Liao et al. 2012).

Another strong partner of PTEN (but also of MAPK14, PDGFRB, ERBB4, and NRG1) is *EGR1*, a transcription factor involved in neuronal plasticity and memory consolidation (Veyrac et al. 2014). *EGR1* is found induced in human epileptic foci and its expression levels correlate with the frequency, amplitude, and total area of the interictal spikes, a hallmark of epileptic neocortex (Rakhade et al. 2007). In turn, *EGR1* downregulates *PLAUR* (Matsunoshita et al. 2011), which encodes the urokinase plasminogen activator receptor and which is a target of *FOXP2*, the renowned ‘language gene’ (Roll et al. 2010). Mice lacking *Plaur* have significantly fewer neocortical GABAergic interneurons, which are vital for oscillatory processes (Bae et

al. 2010), and exhibit nearly complete loss in parvalbumin-containing interneurons during brain development, which is associated with increased susceptibility to spontaneous seizures and with impaired social interactions (Bruneau and Szepetowski 2011). *PLAUR* is an effector of *SRPX2*, another of *FOXP2* targets (Royer-Zemmour et al. 2008) and a candidate for rolandic epilepsy and speech dyspraxia (Roll et al. 2006). One distinctive feature of this benign type of epilepsy with an onset in childhood is the presence of abnormal centrotemporal sharp waves, an endophenotype of rolandic epilepsies that has been associated with *ELP4* (Strug et al. 2009). *ELP4* encodes one component of the elongator protein complex, involved in RNA transcription and tRNA modification, and important for cell mobility and migration, particularly during the development of the cerebral cortex (Creppe et al. 2009). Interestingly, the locus of *ELP4* has been linked to speech sound disorder (SSD) (Pal et al. 2010). Microdeletions of *ELP4* have also been associated with ASD and linguistic deficits (Addis et al. 2015).

*EGR1* expression is induced by *CNR1* (Bouaboula et al. 1995). Genomics studies have highlighted *CNR1* as an important gene for brain changes and metabolic disturbances in SZ (Yu et al. 2013, Suárez-Pinilla et al. 2015), for striatal response to happy faces in a Caucasian cohort of ASD people (Chakrabarti et al., 2006), and for cases of complete absence of expressive speech (Poot et al. 2009). *CNR1* encodes the cannabinoid-1 receptor, which modulates  $\theta$  and  $\gamma$  rhythms in several areas of the brain, including the hippocampus, with an impact on sensory gating function in the limbic circuitry (Hajós et al. 2008). *CNR1*-positive GABAergic interneurons play an important role in the response to auditory cues, as well as in other aspects of behaviour (Brown et al. 2014). *CNR1* is functionally linked to several other genes encoding a subset of related proteins that also appears as a core component of our network (Figure 1), including *HTR1A*, *GRM8*, *GRIN2A*, *GRIN2B*, and *SHANK3*. Interestingly, most of these genes encode neurotransmitter receptors.

Beginning with *HTR1A*, this encodes the receptor 1A of serotonin and modulates hippocampal  $\gamma$  oscillations, seemingly impacting on behavioural and cognitive functions linked to serotonin function, such as learning and memory (Johnston et al. 2014). *GRIN2A* and *GRIN2B* encode two components of the subunit NR2 of the NMDA receptor channel, involved in long-term potentiation, a physiological process underlying memory and learning. *GRIN2A* is reduced in fast-firing interneurons of schizophrenics, which play a critical role in  $\gamma$  oscillation formation: a blockade of NR2A-containing receptors increases  $\gamma$  power and reduces low-frequency  $\gamma$  modulation (Kocsis 2012). Mutations in *GRIN2A* cause epilepsy-aphasia spectrum disorders, including Landau-Kleffner syndrome and continuous spike and waves during slow-wave sleep syndrome (CSWSS), in which language regression and speech impairment are commonly observed (Carvill et al. 2013, Lesca et al. 2013). The gene has been also related to rolandic epilepsies (Dimassi et al. 2014). Speech problems found in patients with mutations in *GRIN2A* include imprecise articulation, problems with pitch and prosody, and poor performance on vowel duration and repetition of monosyllables and trisyllables, which are commonly diagnosed as dysarthria or dyspraxia (Turner et al. 2015). *GRIN2B* plays a key role in normal neuronal development and in learning and memory. Besides its involvement in SZ, ASD, and SLI, mutations in *GRIN2B* have been found in subjects with intellectual disability associated with behavioural problems and EEG anomalies, and in patients with epileptic encephalopathies which co-occur with impairment of motor and cognitive functions (Freunsch et al. 2013, Smigiel et al. 2016, Hu et al. 2016). Finally, *GRM8* encodes a protein with a glutamate, GABA-B-like receptor activity. Several SNPs of the gene have been found associated with  $\theta$  power in subjects with alcohol dependence, which suggests that variation in *GRM8* may modulate  $\theta$  rhythms during information processing (Chen et al. 2009).



In several organisms, *GRIN2B* interacts with *SHANK3*, a postsynaptic scaffolding protein that seems to be important for the maintenance of the adequate balance between neuronal excitation and inhibition. Knockdown of *Shank3* in mouse primary neuron cultures affects the expression of genes involved in long-term potentiation and synaptic activity (Lanz et al. 2013). Cultured cortical neuron networks lacking *Shank3* show reduced excitation and inhibition behaviours (Lu et al. 2016). Specifically, mice lacking the exon 9 of the gene exhibit reduced excitatory transmission in the hippocampal CA1 region and increased frequency of spontaneous inhibitory synaptic events in pyramidal neurons, which result in mildly impaired spatial memory (Lee et al. 2015). Knocked out mice for the gene exhibit abnormal social interaction and repetitive grooming behaviour (Peça et al. 2011). *SHANK3* has been linked as well to some of the distinctive symptoms of Phelan-McDermid syndrome (also known as 22q13 deletion syndrome), including intellectual disability, delayed or absent speech, autistic features, and seizures and abnormal EEG profiles (Soorya et al. 2013, Holder and Quach 2016).

Besides CNVs in *GRIN2A* and *SHANK3*, CNVs in genes related to SLI and DD have been found as well in patients with continuous spike and waves during slow-wave sleep syndrome and Landau-Kleffner syndrome, including *ATP13A4* and *CNTNAP2* (Lesca et al. 2012). The latter encodes a protein associated with  $K^+$  voltage-gated channels in pyramidal cells of the temporal cortex, that are mostly innervated by GABAergic interneurons (Inda et al. 2006). The effect of *CNTNAP2* on language development in the normal population (see Whitehouse et al. 2011, Whalley et al. 2011, Kos et al. 2012) is seemingly due to its role in dendritic arborization and spine development (Anderson et al. 2012), brain connectivity and cerebral morphology (Scott-Van Zeeland et al. 2010, Tan et al. 2010, Dennis et al. 2011). Homozygous mutations or compound heterozygous CNVs of *CNTNAP2* result in epilepsy and language and speech regression (Strauss et al. 2006, Marchese et al. 2016, Smogavec et al. 2016). Interestingly, mice and rats with homozygous deletions of *Cntnap2* show reduced spectral power in the  $\alpha$  (9-12 Hz) range during wake (Thomas et al. 2016). In mice, *Cntnap2* is regulated by *Auts2* (Oksenberg et al. 2014). *AUTS2* displays the strongest signal of a selective sweep in anatomically-modern humans compared to Neanderthals (Green et al. 2010, Oksenberg et al. 2013) and is a robust candidate for several neurodevelopmental disorders (see Oksenberg and Ahituv 2013 for review). Specifically, CNVs of the gene have been found in patients with language delay and seizures (Nagamani et al. 2013), and the gene has been cited as a candidate for epilepsy (Mefford et al. 2010). Interestingly, *AUTS2* has also been associated with differential processing speeds (Luciano et al. 2011).

As noted above, the dysfunction of GABA signalling contributes to ASD-like stereotypes, Rett syndrome phenotypes, and SZ (Chao et al. 2010, Fazzari et al. 2010). Alteration of the GABA catabolism also results in brain and behavioral anomalies that mimic the symptoms of ASD, including language impairment (Gibson et al. 1997, Pearl et al. 2003). The fact that our list of candidates for the language oscillogenome includes several receptors for GABA reinforces the view that GABA signalling is crucial for the oscillatory signature of language. As shown in Figure 1, a third robust subnetwork includes *GABRB3*, *GABARAP* and two interactors; *NSF* and *SNAP25*. *GABRB3* encodes the  $\beta$ -3 subunit of the GABA receptor A (Cook et al. 1998, Shao et al. 2002, Shao et al. 2003). Besides its known association with ASD, the gene has been associated as well with childhood absence epilepsy (Urak et al., 2006). Differences in the expression level of the *GABRB3* have been related to changes in the firing of hippocampal pyramidal neurons and the activity of fast networks (Heistek et al. 2010). More generally, genetic variation in  $GABA_A$  receptor properties have been linked to differences in  $\beta$  and  $\gamma$  oscillations, which seemingly impact on network dynamics and cognition (Porjesz et al. 2002). *GABARAP* encodes a  $GABA_A$  receptor-associated protein involved in the clustering of

neurotransmitter receptors, but also in inhibitory neural transmission. *Gabarap* knockout mice exhibit abnormal paroxysmal sharp waves in the hippocampus (Nakajima et al. 2012). Estrogen depletion resulting from the inhibition of *CYP19A1* affects GABA synthesis and gives rise to increased spine density and decreased threshold for hippocampal seizures (Zhou et al. 2007). Regarding NSF and SNAP25, both are needed for neurotransmitter release and synaptic function. *NSF* encodes a protein involved in vesicle-mediated transport in the Golgi apparatus, whereas SNAP25 contributes to the formation of the soluble NSF attachment protein receptor complex. In mice, reduced levels of Snap25 seems to be related to more frequent spikes, diffuse network hyperexcitability, and epileptiform discharges, as well as to cognitive deficits and social impairment (Corradini et al. 2014, Braida et al. 2015).

Downregulation of GABA receptors has been linked as well to altered expression of *FMRI*. Specifically, reduced levels of GABR $\beta$ 3 and of FMRP have been found in the vermis of adult subjects with ASD (Fatemi et al. 2011), as well as in the hippocampus of *En2*(-/-) mice model of ASD (Provenzano et al. 2015). FMRP is encoded by *FMRP1*, the main candidate for Fragile X syndrome, a condition involving language problems and frequent features of ASD (Kaufmann et al. 2004, Smith et al. 2012). Low levels of FMRP have been found as well in schizophrenic patients with low IQs (Kovács et al. 2013). *Fmr1* knockout mice exhibit enhanced mGluR5 signalling, which results in altered neocortical rhythmic activity because of changes in neocortical excitatory circuitry (Hays et al. 2011). These mice also exhibit abnormal patterns of coupling between  $\theta$  and  $\gamma$  oscillations in perisomatic and dendritic hippocampal CA1 local field potentials, resulting in abnormally weak changes during tasks involving cognitive challenge (Radwan et al. 2016). Also, inhibitory dysfunctions in layer II/III of the somatosensory cortex has been found in *Fmr1* knockout mice, in particular, a reduced activation of low-threshold-spiking interneurons and reductions in synchronized synaptic inhibition and coordinated spike synchrony in pyramidal neurons in response to mGluR agonists (Paluszkiewicz et al. 2011).

*FMRI* has been suggested to fit with *ROBO1*, *KIAA0319*, *S100B*, and *DCDC2*, among others, into a theoretical molecular network involved in neuronal migration and neurite outgrowth (Poelmans et al. 2011). All these genes are candidates for DD according to results from association studies, GWA analyses, and CNVs studies (Paracchini et al. 2016), and all have been related to abnormal patterns of brain oscillations or seizures when mutated. Accordingly, they seem to us to be promising candidates for the oscillatory signature of language. Rare variants in the intergenic region between *DCDC2* and *KIAA0319*, and in one intron of *DCDC2* (*locus* DYX2) have been associated with differences between dyslexic and control children in a late mismatch negativity around 300-700ms originating in right central-parietal areas when discriminating between complex auditory stimuli, such as syllables and words (Czamara et al. 2011). *ROBO1* regulates interaural interaction in auditory pathways (Lamminmäki et al. 2012) and is a target of miR-218, which is significantly downregulated in the hippocampus of patients with medial temporal lobe epilepsy (Kaalund et al. 2014). *S100b* knockout mice show a reduced  $\gamma$  band (30-80 Hz) response in the hippocampus after seizure induction with kainic acid (Sakatani et al. 2007). Altered expressions of *S100B* have been found in patients with medial temporal epilepsy (Lu et al. 2010). This suggests that the S100B-related pathways might contribute to the modulation of brain oscillations in specific conditions. *S100B* encodes a calcium-binding protein involved in neurite extension and axonal proliferation, ultimately being involved in synaptic plasticity and learning.

The remainder of our candidate genes are not clearly functionally interconnected in the core interacting network (Figure 1), although all of them play relevant roles in brain oscillations and

are candidates for the basis of language impairments (see Table 1). This is why we still regard them as important components of the language oscillogenome. *FOXP1* is co-expressed with *FOXP2* in some areas of the brain and the protein FOXP1 forms heterodimers with the FOXP2 protein. *FOXP1* haplo-insufficiency has been found in patients with epileptiform discharges, severe speech delay, and delayed gross motor skills (Carr et al. 2010). *Cx3cr1* knockout mice show deficient synaptic pruning, weak synaptic transmission, decreased functional brain connectivity, and social and behavioural features that resemble those found in ASD patients (Zhan et al. 2014). Interestingly, these mice also exhibit reduced  $\theta$ -driven connections between prefrontal cortex and dorsolateral hippocampus relative to wild-type littermates (Zhan 2015). As with other proteins associated with ion channels, like CNTNAP2, DPP10 is of interest due to its binding capacity to  $K^+$  channels and its ability to modify their expression and biophysical properties (Djurovic et al. 2010). Rare mutations in *DPP10* have been associated with ASD (Marshall et al. 2008). *MBD5* encodes a protein with a methyl-CpG-binding domain which binds to methylated DNA. *MBD5* haplo-insufficiency has been associated with epilepsy, severe speech delay, mental retardation, and ASD-features (Williams et al. 2010, Talkowski et al. 2011). *SETBP1* is a candidate for Schinzel-Giedion syndrome, which entails severe developmental delay and occasional epilepsy (Ko et al. 2013, Miyake et al. 2015). Mutations on the gene also result in social and behavioural problems (Coe et al. 2014). The C-terminal portion of COL4A2 arrests cell proliferation and migration; mutations in *COL4A2* have been found in patients with severe developmental delay and epilepsy (Giorgio et al. 2015, Smigiel et al. 2016). *SCN1A* encodes the large  $\alpha$  subunit of the voltage-gated sodium channel NaV1.1, which plays a key role in the generation and propagation of action potentials. Mutations in *SCN1A* have been found in individuals with ASD (Weiss et al. 2003, O’Roak et al. 2011), but mostly in patients with epilepsy (Schutte et al. 2016). In mice, the downregulation of the gene dysregulates hippocampal oscillations and results in a spatial memory deficit (Bender et al. 2013). Finally, *KANSL1* plays a role in chromatin organization and gene transcription regulation as part of the NSL1 complex. *KANSL1* is a candidate for Koolen-de Vries syndrome, which entails epilepsy, developmental delay, and moderate intellectual disability, mostly impacting expressive language development (Koolen et al. 2016).

The functional enrichment, based on gene ontology (GO) annotations, of our set of candidates for the language oscillogenome (Table 1) points out that most of these genes act in signalling pathways known to be important for language processing via its oscillatory implementation, particularly through dopaminergic, GABAergic and glutamatergic synapses (see GO annotation table in Figure 1). Noticeably, the top-scoring biological processes (resulting from functional annotations) include the regulation of behaviour, learning and memory. Finally, considering the cellular localization of the proteins, most of them appear to localize in the plasma membrane, inside the neuron projection components, confirming their role as regulators of neuronal interconnection. In the next section, we discuss how the role played by these genes may underlie most of the oscillatory aspects of brain function that are important for language production and comprehension.

### 3. Linking the language oscillogenome to language processing

Having documented the most likely candidates which could constitute a robust oscillogenome, we now turn to the neurocomputational implementation of language processing, and how an abnormal genetic profile can in turn give rise to abnormal oscillatory signatures. The core feature of our oscillogenomic approach is a rich level of cross-disciplinary integration.

As Anderson (2016: 6) says of the relationship between evolutionary psychology and neuroscience, ‘function in the brain depends upon, at least: a neural network, an underlying genetic network, and an overlaid chemical gradient. Each of these elements is only partially understood, and their dynamic interactions even less so’. By attempting to draw causal relations between genes, oscillations, and linguistic computations we hope that we can shed some light on the nature of these interactions. As noted earlier, the interpretation and construction of linguistic phrases require a range of particular cross-frequency couplings across certain regions (Murphy 2016a, b). Genes are expected to contribute decisively to the emergence of this global neuronal workspace, yielding specific patterns of long-distance connections among distributed neurons and, as a result, specific oscillatory signatures of language.

Figure 2 details the most recent oscillatory model of linguistic phrase-structure building, which we have elsewhere tested against the abnormal oscillatory profiles documented in ASD and SZ subjects with language deficits (Benítez-Burraco and Murphy, 2016; Murphy and Benítez-Burraco, 2016). In Figure 2, after inhibition reduces over the  $\theta$  cycle the most excitable representation would be itemized via low-middle  $\gamma$ , followed by other clusters. This complex would then be nested within the phase of left-cortical  $\delta$ , attributing to the set a phrasal identity. Certain of these  $\gamma$  clusters would then slow to  $\beta$  to be maintained in memory. This process of phrasal construction is assumed in Murphy (2015b) to be the only human-specific linguistic computation. Maintaining mentally constructed visual objects also results in greater fronto-parietal  $\theta$  synchronisation (Ewerdwalbesloh et al. 2016), suggesting that this frequency band could be optimised for maintaining complex linguistic representations generated in fronto-parietal circuits. In brief, a lexicalisation process generated by a  $\theta$ - $\gamma$  code would interact with a phrasal construction process of  $\delta$  phase-entrainment (see Murphy 2016b for further details). This is a more computationally explicit framework than predictive coding models (e.g. Kesller et al 2016), going beyond simple procedures like ‘what’ and ‘where’ computations into set-theoretic notions more in line with contemporary linguistic theory.

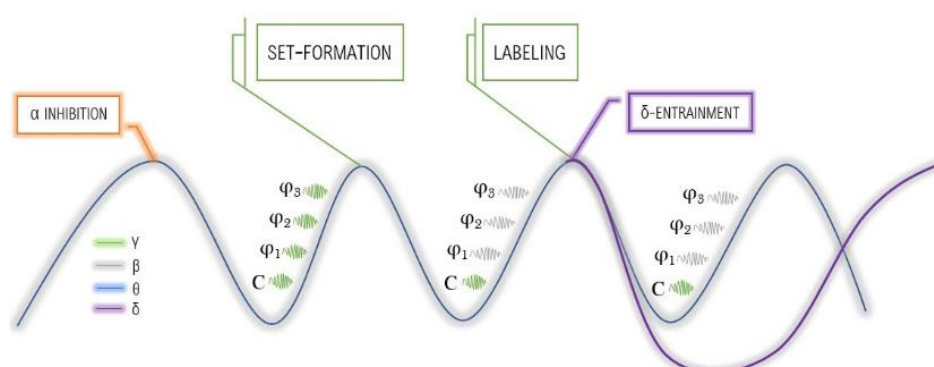

**Figure 2. A multiplexing algorithm for feature-set construction.** ‘C’ denotes Case feature, ‘ $\phi$ ’ refers to  $\phi$ -features (Person, Number, Gender). During the encoding of the feature-set, the initial features are represented at the most preferred phase of  $\theta$  (the trough), resulting in cross-frequency coupling. Phase-aligned oscillatory activity permits the encoding and decoding of multiple information streams, referred to as multiplexing (Akam and Kullmann, 2014). The hypothesis in Murphy (2016b), adopted here, is that this may be what is required to bind distinct linguistic representations. Reproduced from Murphy (2016b).

Language impairments in ASD at the syntax-semantics interface most often involve difficulties with relative clauses, wh-questions, raising and passives (Perovic and Janke 2013, Perovic et al. 2007, Wada 2015). Both Kikuchi et al. (2013) and Rojas et al. (2008) reported significantly increased  $\gamma$  power for ASD individuals, likely going some way to explain their abnormal linguistic comprehension in tandem with the model in Figure 2, with Kikuchi et al. finding in



addition reduced cross-cortical  $\theta$ ,  $\alpha$  and  $\beta$ . Bangel et al. (2014) found reduced  $\beta$  during a number estimation task in ASD, and broader disruptions in rhythmic coordination have been frequently documented. These findings may be (partly) explained through what we have reviewed above; namely, that low voltage  $\alpha$  has been associated with low activity levels in COMT (Enoch et al. 2003). As mentioned, *ZNF804A*, *HTR1A* and *GRIN2B* modulate hippocampal  $\gamma$  oscillations (Cousijn et al. 2015) with *ZNF804A* additionally contributing to cortical functioning and neural connectivity, and so these genes may play a role in the etiopathogenesis of the ASD  $\gamma$  profile. We also noted that knockout of *Pdgfrb* results in reduced auditory phase-locked  $\gamma$  oscillations, which may be a primary cause of similar oscillatory affects in ASD and SZ. We also reviewed how  $\theta$ -induced long-term potentiation is altered in hippocampal area CA1 of transgenic mice expressing a truncated version of *Disc1* (Booth et al. 2014).

The ASD oscillome also appears to frequently involve reduced  $\theta$  during tasks necessitating inter-regional synchronisation (Doesburg et al. 2013). The reduced  $\theta$  in the ASD population (also documented by Kikuchi et al. 2013) may therefore arise from these or related hippocampal ensembles, which would in turn contribute to working memory deficits, impacting semantic processing.

Unusually long-lasting prefrontal and central  $\gamma$  has also been documented in ASD individuals during the interpretation of semantic incongruity (Braeutigam et al. 2008), possibly indicating the recruitment of a general search mechanism (fast  $\gamma$ ) to replace the normal rhythmic processes (slow  $\gamma$ ) responsible for retrieving and comparing semantic representations. As noted, heterozygous mice for *Dlx5/6* exhibit reduced cognitive flexibility which appears to emerge from abnormal GABAergic interneurons and  $\gamma$  rhythms (Cho et al. 2015), and it is possible that this is the correct oscillogenomic model to account for this abnormal  $\gamma$  profile.

ASD patients with abnormal levels of *MECP2* show an abnormal  $\gamma$  response in auditory stimulus discrimination tasks (Peters et al. 2015). Similarly, in response to auditory stimulation mice with a heterozygous loss of *Mecp2* function display increased latency of cortically sourced components, and also display  $\gamma$  and  $\beta$  abnormalities associated with ASD and SZ (Liao et al. 2012). Picture-naming tasks also result in reduced  $\gamma$  and  $\beta$  in the left inferior frontal gyrus in ASD participants (Buard et al. 2013), while Jochaut et al. (2015) found altered oscillatory connectivity between auditory and language cortices; results potentially explicable via this oscillogenomic account. In particular, Jochaut et al. discovered that  $\theta$ - $\gamma$  coupling is severely impaired during speech processing in ASD (Jochaut et al. 2015), a finding which may relate to the knockout of *Pdgfrb* resulting in reduced auditory phase-locked  $\gamma$ . In addition, we noted that *Fmr1* knockout mice exhibit enhanced mGluR5 signalling, resulting in altered neocortical rhythmic activity (Hays et al. 2011). Since these mice exhibit abnormal patterns of coupling between hippocampal  $\theta$  and  $\gamma$  (Radwan et al. 2016), this provides another strong oscillogenomic candidate for  $\theta$ - $\gamma$  coupling disruptions.

Xu et al.'s (2013) study of lexical decision in SZ also exposed reduced left-temporal and left-frontal  $\alpha$  and  $\beta$  – a rhythmic profile also found in Moran and Hong's (2011) and Uhlhaas et al.'s (2008) studies of SZ. Xu et al.'s (2012) sentence presentation task additionally revealed reduced  $\theta$  at occipital and right frontal lobe sites. As noted, the cannabinoid-1 receptor encoded by *CNR1* modulates  $\theta$  and  $\gamma$  rhythms in several brain areas (Hajós et al. 2008) and so may be involved in these abnormalities. Relatedly, a blockade of NR2A-containing receptors increases  $\gamma$  power and reduces low-frequency  $\gamma$  modulation; we have previously documented unusually fast  $\gamma$  in SZ and ASD patients (Murphy and Benítez-Burraco 2016), and so this may be part of the underling oscillogenomic basis. Decomposing the P300 event-related component into its



constituent  $\theta$  and  $\delta$  rhythms, Jones et al. (2004) report significant linkage and linkage disequilibrium between frontal  $\theta$  band and a single nucleotide polymorphism from the cholinergic muscarinic receptor gene (*CHRM2*) on chromosome 7. Due to the likely role of this gene in higher cognition (Gosso et al. 2007), this makes it a strong candidate gene for cognitive deficits in SZ.

Knockout of *Ppargc1a* in mice decreases the spread of activation in hippocampal CA1 and limits pyramidal cell spiking, giving rise also to unusual modulations of kainate-induced  $\gamma$  oscillations (Bartley et al. 2015). *PPARGC1A* deficiency in ASD may consequently lead to direct oscillatory alterations at this frequency band. We also noted an association between *GRM8* and  $\theta$  power, suggesting that variations in *GRM8* may modulate  $\theta$  rhythms during information processing, potentially opening it up as a candidate gene for ASD, SZ and DD, given the abnormal  $\theta$  modulations documented in these disorders.

With respect to the oscillatory basis of the syntax-phonology interface, we noted that speech problems found in patients with mutations in *GRIN2A* include imprecise articulation and problems with pitch and prosody – archetypal problems documented in DD. Other research indicates that individuals with developmental DD cannot achieve correct phonological representations in the brain, and that these problems arise from impaired phase-locking to slower modulations in the speech signal (below 10Hz, particularly around 2Hz), impacting syllabic parsing (Hämäläinen et al. 2012, see also Lehongre et al. 2011). Due to its relevance in the P300 component, the cholinergic muscarinic receptor gene *CHRM2* is a possible candidate for these  $\delta$  abnormalities (Callaway 1983). Soltész et al. (2013) observed weaker entrainment in right auditory cortex of dyslexic patients during the processing of tone streams delivered at 2 Hz. The authors suggested a connection between reading performance and neuronal anticipatory phase-synchronization in  $\delta$ . Abnormal  $\delta$  rhythms in auditory cortex have been found in dyslexics during the processing of speech sounds too (Molinaro et al. 2016).

It has also been suggested that increased anterior  $\beta$  is a hallmark of dysphonetic dyslexics, who experience problems with grapheme-to-phoneme conversions, whereas increased posterior  $\beta$  are typically found in dyseidetic children, who have difficulties accessing the visual lexicon (Flynn et al. 1992). These findings are compatible with the model in Figure 2, since anterior  $\beta$  is here assumed to be involved in the maintenance of the existing ‘cognitive set’, with abnormal  $\beta$  impairing the ability of dysphonetic dyslexics to hold one linguistic representation in memory and compare/convert it into another.

Relative to controls, dyslexics also exhibit stronger high  $\gamma$  phase-synchronization in left auditory cortex, possibly indicating the wealth of spectrotemporal information reaching this region, compromising the  $\theta$ -related auditory buffering capacity along with verbal working memory (Lehongre et al. 2011). This would in turn impair the feature-set combinatorial capacities of dyslexics, with both  $\theta$  and  $\gamma$ , and their cross-frequency coupling, being abnormal, and so the potential candidate genes discussed above for ASD and SZ (e.g. *GRM8*) are also possible candidates for dyslexia.

Turning to SLI, Bishop et al. (2010) explored the discrimination of non-linguistic sounds in a group of 32 patients, comparing them to syllables in an oddball paradigm. Healthy controls exhibited event-related desynchronization in  $\delta$ ,  $\theta$  and  $\alpha$  during the presentation of oddballs, but SLI patients did not, pointing to a low-level auditory perceptual impairment in SLI. Further studies are needed in order to develop a more fine-grained picture of the perceptual and computational properties of SLI language comprehension, but we can nevertheless conclude

that the candidate genes discussed above for these frequency bands remain potential candidates for the SLI oscillogenome.

Comparing the language deficits observed in dyslexia and SLI on the one hand with those observed in ASD and SZ on the other, it seems clear that they both exhibit  $\delta$  abnormalities of distinct neurocomputational properties. In dyslexia, entrainment to the speech envelope (phonology) is impaired due to abnormal  $\delta$  (leading to problems with slow-rate speech processing; Goswami et al. 2013), whereas in ASD and schizophrenia it appears that patients cannot properly exploit the  $\delta$ -related processes of phrasal construction and identification. The  $\delta$  rhythm therefore seems to act as a syntax-phonology interface but also a syntax-semantics interface, depending on which other regions are impaired in the particular disorder, such as the right supramarginal gyrus (Cutini et al. 2016) and left inferior frontal gyrus (Molinaro et al. 2016) in dyslexics.

As a way of modelling what we have discussed here, Figure 3 outlines a general schema with some specific examples taken from this section. The bridge between the three levels described here – between the pathophysiology of language deficits in particular cognitive disorders and their linguistic profiles – remains very much open, but we hope that our framework will play a reflective role in theoretically grounding emerging findings in genetics and neural dynamics within a broader understanding of language processing and evolution.

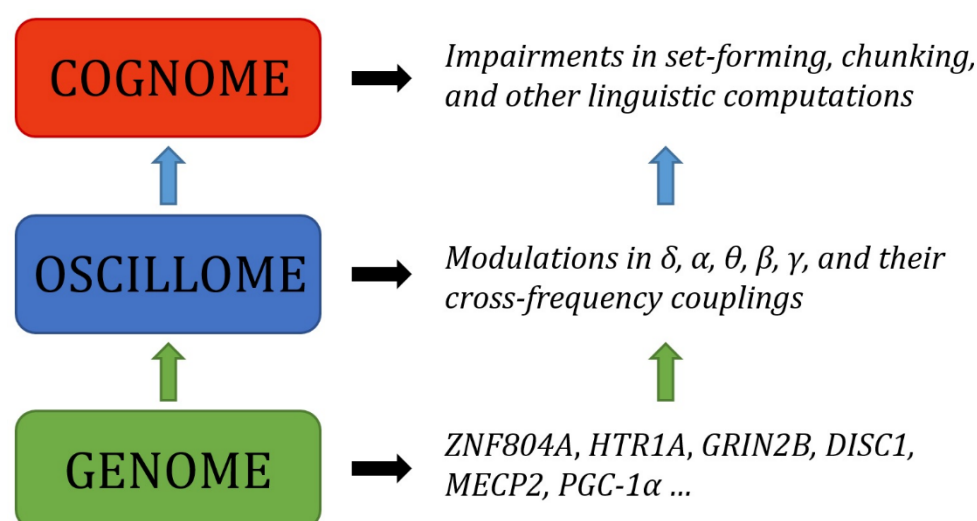

**Figure 3. Outline of a putative oscillogenomic model for the human faculty of language.** ASD, SZ, SLI and DD have been used as guiding ‘oscillopathies’, whereas linguistic theory has been employed as a guide for the neurocomputational basis of language. The genome is expected to modulate frequency bands and their interactions at the level of the oscillome, which in turn impacts computational operations at the ‘cognome’, that is, the basic cognitive operations underlying language, to use a term of Poeppel’s (2012).

#### 4. Conclusions

Next generation sequencing technologies have greatly expanded the set of genes associated to cognitive diseases entailing language deficits. In truth, the polygenism seen in these clinical conditions is somewhat commensurable with the polygenism expected for language more generally, which we need to properly seize if we want to understand how language unfolds in the brain and grows in the child. Molecular biology techniques have significantly increased our

knowledge of the role played by these genes in the healthy and the impaired brains. Neuroimaging facilities show how the brain organizes thorough development and processes language, in effect, via the coupling of diverse brain oscillations which enables complex interactions between local and distant brain areas. Nonetheless, it remains imperative to bridge the gap between genes, brain development and function, and language; and consequently to bridge the gap between pathological mutations, abnormal brain activity, and language deficits. Because brain oscillations can provide an explanation for how the brain processes language, but can also construct successful endophenotypes of conditions involving language impairment, we have here relied on them to attempt to make substantial theoretical gains in this direction.

Our main conclusion is that the functions of the genes discussed here crucially match aspects of the language oscillome. We have argued that the molecular findings appear to align with the experimental oscillatory results, which in turn align with components of the language cognitive phenotype. As it stands, these findings only afford tenuous causal-explanatory power to the present genome-oscillome-language linking hypotheses, and further experimental oscillatory and genetic research is required to strengthen the viability of the current gene set and increase the number of candidate genes. Specifically, we need to refine the mapping of these and other future candidate genes on specific cell functions, brain areas, aspects of brain function, neuronal developmental processes, and basic cognitive abilities. Animal models will help refine our understanding of the role of these genes and reinforce the links we have highlighted in the paper. Lastly, we expect that our approach will help achieve a better understanding of the complex etiopathogenesis of cognitive conditions entailing problems with language, which should help in turn to design better therapeutic approaches to the diseases (see Wilkinson and Murphy 2016) aimed to ameliorate the symptoms and improve the abilities of the affected people.

**Acknowledgments:** This work was supported by an Economic and Social Research Council scholarship (1474910) to EM, and by funds from the Spanish Ministry of Economy and Competitiveness (grant numbers FFI2014-61888-EXP and FFI-2013-43823-P) to ABB.

## References

- Addis, L., Ahn, J. W., Dobson, R., Dixit, A., Ogilvie, C. M., Pinto, D., et al., 2015. Microdeletions of ELP4 are associated with language impairment, autism spectrum disorder, and mental retardation. *Hum. Mutat.* 36, 842-50.
- Akam, T., Kullmann, D.M., 2014. Oscillatory multiplexing of population codes for selective communication in the mammalian brain. *Nat. Rev. Neurosci.* 15, 111-122.
- Amiri, A., Cho, W., Zhou, J., Birnbaum, S. G., Sinton, C. M., McKay, R. M., et al., 2012. Pten deletion in adult hippocampal neural stem/progenitor cells causes cellular abnormalities and alters neurogenesis. *J Neurosci.* 32, 5880-90. doi: 10.1523/JNEUROSCI.5462-11.2012.
- Anderson, M.L. 2016. Précis of After Phrenology: Neural Reuse and the Interactive Brain. *Behavioral and Brain Sciences* doi:10.1017/S0140525X15000631, e120.
- Anitha, A., Nakamura, K., Thanseem, I., Yamada, K., Iwayama, Y., Toyota, T., et al., 2012. Brain region-specific altered expression and association of mitochondria-related genes in autism. *Mol Autism.* 3, 12. doi: 10.1186/2040-2392-3-12.
- Bae, M. H., Bissonette, G. B., Mars, W. M., Michalopoulos, G. K., Achim, C. L., Depireux, D. A., et al., 2010. Hepatocyte growth factor (HGF) modulates GABAergic inhibition and seizure susceptibility. *Exp Neurol.* 221, 129-35. doi: 10.1016/j.expneurol.2009.10.011.
- Bangel, K.A., Batty, M., Ye., A. X., Meaux, E., Taylor, M.J., Doesburg S.M., 2014. Reduced beta band connectivity during number estimation in autism. *NeuroImageClin* 6, 202-213.

- Bartley, A.F., Lucas, E.K., Brady, L.J., Li, Q., Hablitz, J.J., Cowell, R.M., et al., 2015. Interneuron transcriptional dysregulation causes frequency-dependent alterations in the balance of inhibition and excitation in hippocampus. *J Neurosci* 35, 15276-90.
- Becker, J., Czamara, D., Hoffmann, P., Landerl, K., Blomert, L., Brandeis, D., et al. 2012. Evidence for the involvement of ZNF804A in cognitive processes of relevance to reading and spelling. *Transl. Psychiatry* 2, e136.
- Begleiter, H., Porjesz, B., 2006. Genetics of human brain oscillations. *Int J Psychophysiol* 60, 162-171.
- Benítez-Burraco, A., Murphy, E., 2016. The oscillopathic nature of language deficits in autism: from genes to language evolution. *Front. Hum. Neurosci.* 10, 120.
- Berman, J.I., Liu, S., Bloy, L., Blaskey, L., Roberts, T.P.L., Edgar, J.C., 2015. Alpha-to-gamma phase-amplitude coupling methods and application to autism spectrum disorder. *Brain Connect* 5, 80-90.
- Berwick, R.C., Chomsky, N. 2015. Foreword: A bird's-eye view of human language and evolution, in: Bolhuis, J.J., Everaert, M. (Eds.), *Birdsong, Speech, and Language: Exploring the Evolution of Mind and Brain*. Cambridge, MA, MIT Press. pp. ix-xii.
- Bishop, D.V.M., Hardimann, M.J., Barry, J.G., 2010. Lower-frequency event-related desynchronization: a signature of late mismatch responses to sounds, which is reduced or absent in children with specific language impairment. *J Neurosci* 30, 15578-15584.
- Bond, A. M., Vangompel, M. J., Sametsky, E. A., Clark, M. F., Savage, J. C., Disterhoft, J.F., et al., 2009. Balanced gene regulation by an embryonic brain ncRNA is critical for adult hippocampal GABA circuitry. *Nat Neurosci.* 12, 1020-7. doi: 10.1038/nn.2371.
- Booth, C. A., Brown, J. T., Randall, A. D., 2014. Neurophysiological modification of CA1 pyramidal neurons in a transgenic mouse expressing a truncated form of disrupted-in-schizophrenia 1. *Eur. J. Neurosci.* 39, 1074-90.
- Bouaboula, M., Bourrié, B., Rinaldi-Carmona, M., Shire, D., Le Fur, G., Casellas P. 1995. Stimulation of cannabinoid receptor CB1 induces krox-24 expression in human astrocytoma cells. *J Biol Chem.* 270, 13973-80.
- Braeutigam, S., Swithenby, S.J., Bailey, A.J., 2008. Contextual integration the unusual way: a magnetoencephalographic study of responses to semantic violation in individuals with autism spectrum disorder. *Eur. J. Neurosci.* 27, 1026-1036.
- Braida, D., Guerini, F. R., Ponzoni, L., Corradini, I., De Astis, S., Pattini, L., et al., 2015. Association between SNAP-25 gene polymorphisms and cognition in autism: functional consequences and potential therapeutic strategies. *Transl Psychiatry* 5, e500. doi: 10.1038/tp.2014.136.
- Brandon, N.J., Sawa, A., 2011. Linking neurodevelopmental and synaptic theories of mental illness through DISC1. *Nat. Rev. Neurosci.* 12, 707-22.
- Bruneau, N., Szepetowski, P., 2011. The role of the urokinase receptor in epilepsy, in disorders of language, cognition, communication and behavior, and in the central nervous system. *Curr Pharm Des* 17, 1914-23.
- Buard, I., Rogers, S.J., Hepburn, S., Kronberg, E., Rojas, D.C., 2013. Altered oscillation patterns and connectivity during picture naming in autism. *Front. Hum. Neurosci.* 7, 742.
- Buxbaum, J. D., Cai, G., Chaste, P., Nygren, G., Goldsmith, J., Reichert, J., et al. 2007. Mutation screening of the PTEN gene in patients with autism spectrum disorders and macrocephaly. *Am. J. Med. Genet. B Neuropsychiatr. Genet.* 144B, 484-91.
- Callaway, E., 1983. The pharmacology of human information processing. *Psychopharmacologia* 20, 359-370.
- Carr, C. W., Moreno-De-Luca, D., Parker, C., Zimmerman, H. H., Ledbetter, N., Martin, C. L., et al., 2010. Chiari I malformation, delayed gross motor skills, severe speech delay, and

- epileptiform discharges in a child with FOXP1 haploinsufficiency. *Eur J Hum Genet.* 18, 1216-20. doi: 10.1038/ejhg.2010.96.
- Chakrabarti, B., Kent, L., Suckling, J., Bullmore, E., Baron-Cohen, S., 2006. Variations in the human cannabinoid receptor (CNR1) gene modulate striatal responses to happy faces. *Eur J Neurosci.* 23, 1944-8.
- Chao, H. T., Chen, H., Samaco, R. C., Xue, M., Chahrouh, M., Yoo, J., et al., 2010. Dysfunction in GABA signalling mediates autism-like stereotypies and Rett syndrome phenotypes. *Nature* 468, 263-9.
- Chen, X. S., Reader, R. H., Hoischen, A., Veltman, J. A., Simpson, N. H., SLI Consortium, et al., 2016. Next-generation sequencing identifies novel gene variants and pathways involved in specific language impairment. <http://biorxiv.org/content/biorxiv/early/2016/06/23/060301.full.pdf>
- Chen, A.C.H., Tang, Y., Rangaswamy, M., Wang, J.C., Almasy, L., Foroud, T., et al., 2009. Association of single nucleotide polymorphisms in a glutamate receptor gene (GRM8) with theta power of event-related oscillations and alcohol dependence. *Am J Med Genet B Neuropsychiatr Genet.* 150B, 359-368.
- Cho, K. K., Hoch, R., Lee, A. T., Patel, T., Rubenstein, J. L., Sohal, V. S., 2015. Gamma rhythms link prefrontal interneuron dysfunction with cognitive inflexibility in *Dlx5/6(+/-)* mice. *Neuron* 85, 1332-43.
- Clipperton-Allen, A. E., Page, D. T., 2014. Pten haploinsufficient mice show broad brain overgrowth but selective impairments in autism-relevant behavioral tests. *Hum Mol Genet.* 23, 3490–3505. doi: 10.1093/hmg/ddu057.
- Cobos, I., Long, J. E., Thwin, M. T., Rubenstein, J. L., 2006. Cellular patterns of transcription factor expression in developing cortical interneurons. *Cereb. Cortex.* 16, 82-88.
- Coe, B.P., Witherspoon, K., Rosenfeld, J.A., van Bon, B.W., Vulto-van Silfhout, A.T., Bosco, P., et al., 2014. Refining analyses of copy number variation identifies specific genes associated with developmental delay. *Nat Genet.* 46, 1063-71. doi: 10.1038/ng.3092.
- Courcet, J. B., Faivre, L., Malzac, P., Masurel-Paulet, A., López, E., Callier, P., et al. 2012. The *DYRK1A* gene is a cause of syndromic intellectual disability with severe microcephaly and epilepsy. *J. Med. Genet.* 49, 731-6.
- Cousijn, H., Tunbridge, E. M., Rolinski, M., Wallis, G., Colclough, G. L., Woolrich, M. W., et al. 2015. Modulation of hippocampal theta and hippocampal-prefrontal cortex function by a schizophrenia risk gene. *Hum. Brain Mapp.* 36, 2387-95.
- Creppe, C., Malinouskaya, L., Volvert, M. L., Gillard, M., Close, P., Malaise, O., et al. 2009. Elongator controls the migration and differentiation of cortical neurons through acetylation of alpha-tubulin. *Cell* 136, 551-64.
- Cutini, S., Szűcs, D., Mead, N., Huss, M., Goswami, U. 2016. Atypical right hemisphere response to slow temporal modulations in children with developmental dyslexia. *Neuroimage* 143, 40-49. doi:10.1016/j.neuroimage.2016.08.012.
- Damaj, L., Lupien-Meilleur, A., Lortie, A., Riou, E., Ospina, L. H., Gagnon, L., et al., 2015. *CACNA1A* haploinsufficiency causes cognitive impairment, autism and epileptic encephalopathy with mild cerebellar symptoms. *Eur J Hum Genet.* 23, 1505-12. doi: 10.1038/ejhg.2015.21.
- Dasari, V. R., Kaur, K., Velpula, K. K., Gujrati, M., Fassett, D., Klopfenstein, J. D., et al. 2010. Upregulation of PTEN in glioma cells by cord blood mesenchymal stem cells inhibits migration via downregulation of the PI3K/Akt pathway. *PLoS One* 5, e10350.
- Doesburg, S.M., Vidal, J., Taylor, M.J., 2013. Reduced theta connectivity during set-shifting in children with autism. *Front. Hum. Neurosci.* 7, 785.
- Ehrlichman, R.S., Luminais, S.N., White, S.L., Rudnickm N.D., Mam N., Dowm H.C., et al., 2009. Neuregulin 1 transgenic mice display reduced mismatch negativity, contextual fear



- conditioning and social interactions. *Brain Res* 1294, 116-27. doi: 10.1016/j.brainres.2009.07.065.
- Enoch, M.A., Xu, K., Ferro, E., Harris, C.R., Goldman, D., 2003. Genetic origins of anxiety in women: a role for a functional catechol-O-methyltransferase polymorphism. *Psychiatr. Genet.* 13, 33–41.
- Ewerdwalbesloh, J.A., Palva, S., Rösler, F., Khader, P.H., 2016. Neural correlates of maintaining generated images in visual working memory. *Hum Brain Mapp* 37, 4349-4362. doi:10.1002/hbm.23313.
- Fatemi, S.H, Folsom, T.D, Kneeland, R.E, Liesch, S.B., 2011. Metabotropic glutamate receptor 5 upregulation in children with autism is associated with underexpression of both Fragile X mental retardation protein and GABAA receptor beta 3 in adults with autism. *Anat Rec (Hoboken)* 294, 1635-45. doi: 10.1002/ar.21299.
- Flynn, J.M., Deering, W., Goldstein, M., Rahbar, M.H., 1992. Electrophysiological correlates of dyslexic subtypes. *J Learn Disabil* 25, 133-141.
- Freunsch, I., Popp, B., Blank, R., Ende, S., Moog, U., Petri, H., et al., 2013. Behavioral phenotype in five individuals with de novo mutations within the GRIN2B gene. *Behav Brain Funct.* 9, 20. doi: 10.1186/1744-9081-9-20.
- Gao, J., Wang, W. Y., Mao, Y. W., Gräff, J., Guan, J. S., Pan, L., et al., 2010. A novel pathway regulates memory and plasticity via SIRT1 and miR-134. *Nature* 466, 1105–9.
- Ghanem, N., Yu, M., Poitras, L., Rubenstein, J. L., Ekker, M., 2008. Characterization of a distinct subpopulation of striatal projection neurons expressing the *Dlx* genes in the basal ganglia through the activity of the *I56ii* enhancer. *Dev. Biol.* 322, 415-424.
- Ghashghaei, H. T., Weber, J., Pevny, L., Schmid, R., Schwab, M. H., Lloyd, K. C., et al., 2006. The role of neuregulin-ErbB4 interactions on the proliferation and organization of cells in the subventricular zone. *Proc Natl Acad Sci U S A* 103, 1930-5.
- Gibson, K.M., Christensen, E., Jakobs, C., Fowler, B., Clarke, M.A., Hammersen, G., et al., 1997. The clinical phenotype of succinic semialdehyde dehydrogenase deficiency (4-hydroxybutyric aciduria): case reports of 23 new patients. *Pediatrics* 99, 567-74.
- Giorgio, E., Vaula, G., Bosco, G., Giaccone, S., Mancini, C., Calcia, A., et al., 2015. Two families with novel missense mutations in COL4A1: When diagnosis can be missed. *J Neurol Sci* 352, 99–104. doi:10.1016/j.jns.2015.03.042.
- Goffin, D., Brodtkin, E.S., Blendy, J.A., Siegel, S.J., Zhou, Z., 2014. Cellular origins of auditory event-related potential deficits in Rett syndrome. *Nat Neurosci* 17, 804-806. doi:10.1038/nn.3710.
- Gosso, F.M., de Geus, E.J.C., Polderman, T.J.C., Boomsma, D.I., Posthuma, D., Heutink, P., 2007. Exploring the functional role of the CHRM2 gene in human cognition: results from a dense genotyping and brain expression study. *BMC Medical Genetics* 8, 66.
- Goswami, U., Mead, N., Fosker, T., Huss, M., Barnes, L., Leong, V. 2013. Impaired perception of syllable stress in children with dyslexia: a longitudinal study. *JMem Lang* 69, 1-17. doi:10.1016/j.jml.2013.03.001.
- Guedj, F., Pereira, P.L., Najas, S., Barallobre, M.J., Chabert, C., Souchet, B., et al., 2012. DYRK1A: a master regulatory protein controlling brain growth. *Neurobiol Dis* 46, 190-203. doi: 10.1016/j.nbd.2012.01.007.
- Guo, X., Williams, J.G., Schug, T.T., Li, X., 2010. DYRK1A and DYRK3 promote cell survival through phosphorylation and activation of SIRT1. *J Biol Chem* 285, 13223-32
- Hajós, M., Hoffmann, W. E., Kocsis, B., 2008. Activation of cannabinoid-1 receptors disrupts sensory gating and neuronal oscillation: relevance to schizophrenia. *Biol Psychiatry* 63, 1075-83.

- Hall, M.H., Taylor, G., Sham, P., Schulze, K., Rijdsdijk, F., Picchioni, M., et al., 2011. The early auditory gamma-band response is heritable and a putative endophenotype of schizophrenia. *Schizophr Bull* 37, 778-87.
- Hämäläinen, J.A., Rupp, A., Soltész, F., Szücs, D., Goswami, U., 2012. Reduced phase locking to slow amplitude modulation in adults with dyslexia: an MEG study. *NeuroImage* 59, 2952-2961.
- Hämmerle, B., Carnicero, A., Elizalde, C., Ceron, J., Martínez, S., Tejedor, F. J., 2003. Expression patterns and subcellular localization of the Down syndrome candidate protein MNB/DYRK1A suggest a role in late neuronal differentiation. *Eur J Neurosci* 17, 2277-86.
- Hays, S. A., Huber, K. M., Gibson, J.R., 2011. Altered neocortical rhythmic activity states in Fmr1 KO mice are due to enhanced mGluR5 signaling and involve changes in excitatory circuitry. *J Neurosci* 31, 14223-34. doi: 10.1523/JNEUROSCI.3157-11.2011.
- Hinna, K. H., Rich, K., Fex-Svenningsen, Å., Benedikz, E., 2015. The rat homolog of the schizophrenia susceptibility gene ZNF804A is highly expressed during brain development, particularly in growth cones. *PLoS One* 10, e0132456.
- Holder, J.L. Jr, Quach, M. M., 2016. The spectrum of epilepsy and electroencephalographic abnormalities due to SHANK3 loss-of-function mutations. *Epilepsia* 57, 1651-1659. doi: 10.1111/epi.13506.
- Hou, X. J., Ni, K. M., Yang, J. M., Li, X. M., 2014. Neuregulin 1/ErbB4 enhances synchronized oscillations of prefrontal cortex neurons via inhibitory synapses. *Neuroscience* 261, 107-17.
- Hu, C., Chen, W., Myers, S. J., Yuan, H., Traynelis, S. F., 2016. Human GRIN2B variants in neurodevelopmental disorders. *J Pharmacol Sci* 132, 115-121. doi: 10.1016/j.jphs.2016.10.002.
- Jiménez-Bravo, M., Marrero, V., Benítez-Burraco, A., 2017. An oscillopathic approach to developmental dyslexia: from genes to speech processing. *BioRxiv* doi: <https://doi.org/10.1101/108704>
- Jochaut, D., Lehongre, K., Saitovitch, A., Devauchelle, A-D., Ollasagasti, I., Chabane, N. et al. 2015. Atypical coordination of cortical oscillations in response to speech in autism. *Front. Hum. Neurosci.* 9, 171.
- Jones, K. A., Porjesz, B., Almasy, L., Bierut, L., Goate, A., Wang, J.C., Dick, D.M., Hinrichs, A., Kwon, J., Rice, J.P., Rohrbach, J., Stock, H., Wu, W., Bauer, L.O., Chorlian, D.B., Crowe, R.R., Edenberg, H.J., Foroud, T., Hesselbrock, V., Kuperman, S., Nurnberger Jr., J., O'Connor, S.J., Schuckit, M.A., Stimus, A.T., Tischfield, J.A., Reich, T., Begleiter, H., 2004. Linkage and linkage disequilibrium of evoked EEG oscillations with CHRM2 receptor gene polymorphisms: implications for human brain dynamics and cognition. *IntJ Psychophysiol* 53, 75-90.
- Karam, R.A. Rezk, N.A., Abdelrahman, H.M., Hassan, T.H., Mohammad, D., Hashim, H.M., Fattah, N.R., 2013. Catechol-O-methyltransferase Val158Met polymorphism and hyperactivity symptoms in Egyptian children with autism spectrum disorder. *Res Dev Disabil* 34, 2092-2097.
- Kasnauskiene, J., Ciuladaite, Z., Preiksaitiene, E., Utkus, A., Peculyte, A., Kučinskas, V., 2013. A new single gene deletion on 2q34: ERBB4 is associated with intellectual disability. *Am J Med Genet A* 161A, 1487-90.
- Kaufmann, W. E., Cortell, R., Kau, A. S., Bukelis, I., Tierney, E., Gray, R. M., et al., 2004. Autism spectrum disorder in fragile X syndrome: Communication, social interaction, and specific behaviors. *Am J Med Genet A* 129, 225–234
- Kessler, K., Seymour, R.A., Rippon, G., 2016. Brain oscillations and connectivity in autism spectrum disorders (ASD): new approaches to methodology, measurement and modelling. *Neurosci Biobehav Rev* 71, 601-620.

- Kikuchi, M., Shitamichi, K., Yoshimura, Y., Ueno, S., Hiraishi, H., Hirosawa, T., 2013. Altered brain connectivity in 3-to 7-year-old children with autism spectrum disorder. *NeuroImage: Clin* 2, 394-401.
- Kircher, T., Krug, A., Markov, V., Whitney, C., Krach, S., Zerres, K., et al., 2009. Genetic variation in the schizophrenia-risk gene neuregulin 1 correlates with brain activation and impaired speech production in a verbal fluency task in healthy individuals. *Hum Brain Mapp* 30, 3406-16.
- Ko, J.M., Lim, B.C., Kim, K.J., Hwang, Y.S., Ryu, H.W., Lee, J.H., Kim, J.S., Chae, J.H., 2013. Distinct neurological features in a patient with Schinzel-Giedion syndrome caused by a recurrent SETBP1 mutation. *Childs Nerv Syst* 29, 525-9. doi: 10.1007/s00381-013-2047-2.
- Koolen, D. A., Pfundt, R., Linda, K., Beunders, G., Veenstra-Knol, H. E., Conta, J. H., et al. 2016. The Koolen-de Vries syndrome: a phenotypic comparison of patients with a 17q21.31 microdeletion versus a KANSL1 sequence variant. *Eur J Hum Genet* 24, 652–659. doi:10.1038/ejhg.2015.178.
- Kovács, T., Kelemen, O., Kéri, S., 2013. Decreased fragile X mental retardation protein (FMRP) is associated with lower IQ and earlier illness onset in patients with schizophrenia. *Psychiatry Res* 210, 690-3.
- Krug, A., Nieratschker, V., Markov, V., Krach, S., Jansen, A., Zerres, K., et al., 2010. Effect of CACNA1C rs1006737 on neural correlates of verbal fluency in healthy individuals. *Neuroimage* 49, 1831-6.
- Kumar, D., Dedic, N., Flachskamm, C., Voulé, S., Deussing, J. M., Kimura, M., 2015. Cacna1c (Cav1.2) modulates electroencephalographic rhythm and rapid eye movement sleep recovery. *Sleep* 38, 1371-80.
- Lanz, T.A., Guilmette, E., Gosink, M.M., Fischer, J.E., Fitzgerald, L.W., Stephenson, D.T., et al., 2013. Transcriptomic analysis of genetically defined autism candidate genes reveals common mechanisms of action. *Mol. Autism* 4, 45.
- Lehongre, K., Ramus, F., Villiermet, N., Schwartz, D., Giraud, A.-L., 2011. Altered low-gamma sampling in auditory cortex accounts for the three main facets of dyslexia. *Neuron* 72, 1080-1090.
- Lesca, G., Rudolf, G., Labalme, A., Hirsch, E., Arzimanoglou, A., Genton, P., Motte, J., de Saint Martin, A., Valenti, M. P., Boulay, C., De Bellescize, J., Kéo-Kosal, P., Boutry-Kryza, N., Edery, P., Sanlaville, D., Szepietowski, P., 2012. Epileptic encephalopathies of the Landau-Kleffner and continuous spike and waves during slow-wave sleep types: genomic dissection makes the link with autism. *Epilepsia* 53, 1526-38. doi: 10.1111/j.1528-1167.2012.03559.x.
- Lett, T. A., Kennedy, J.L., Radhu, N., Dominguez, L.G., Chakravarty, M.M., Nazeri, A., Farzan, F., Walter, H., Heinz, A., Mulsant, B.H., Daskalakis, Z.J., Voineskos, A.N., 2016. Prefrontal white matter structure mediates the influence of GAD1 on working memory. *Neuropsychopharmacology* 41, 2224-31. doi: 10.1038/npp.2016.14.
- Li, H., Chou, S. J., Hamasaki, T., Pérez-García, C. G., O'Leary, D. D., 2012. Neuregulin repellent signaling via ErbB4 restricts GABAergic interneurons to migratory paths from ganglionic eminence to cortical destinations. *Neural Dev* 7, 10.
- Li, X. H., Chen, C., Tu, Y., Sun, H. T., Zhao, M. L., Cheng, S. X., et al., 2013. Sirt1 promotes axonogenesis by deacetylation of Akt and inactivation of GSK3. *Mol Neurobiol* 48, 490-9.
- Liao, W., Gandal, M.J., Ehrlichman, R.S., Siegel, S.J., Carlson, G.C., 2012. MeCP2<sup>+/-</sup> mouse model of RTT reproduces auditory phenotypes associated with Rett syndrome and replicate select EEG endophenotypes of autism spectrum disorder. *Neurobiol Dis* 46, 88-92.

- Linkenkaer-Hansen, K., Smit, D.J., Barkil, A., van Beijsterveldt, T.E., Brussaard, A.B., Boomsma, D.I., et al., 2007. Genetic contributions to long-range temporal correlations in ongoing oscillations. *J Neurosci* 27, 13882-9.
- López-Bendito, G., Cautinat, A., Sánchez, J. A., Bielle, F., Flames, N., Garratt, A. N., et al., 2006. Tangential neuronal migration controls axon guidance: a role for neuregulin-1 in thalamocortical axon navigation. *Cell* 125, 127-42.
- Manoach, D. S., Pan, J. Q., Purcell, S. M., Stickgold, R., 2015. Reduced sleep spindles in schizophrenia: a treatable endophenotype that links risk genes to impaired cognition? *Biol. Psychiatry* pii: S0006-3223(15)00818-5. doi: 10.1016/j.biopsych.2015.10.003.
- Marchese, M., Conti, V., Valvo, G., Moro, F., Muratori, F., Tancredi, R., Santorelli, F. M., Guerrini, R., Sicca, F., 2014. Autism-epilepsy phenotype with macrocephaly suggests PTEN, but not GLIALCAM, genetic screening. *BMC Med Genet.* 15, 26. doi: 10.1186/1471-2350-15-26.
- Marshall, C. R., Noor, A., Vincent, J. B., Lionel, A.C., Feuk, L., Skaug, J., et al., 2008. Structural variation of chromosomes in autism spectrum disorder. *Am J Hum Genet.* 82, 477-88. doi: 10.1016/j.ajhg.2007.12.009.
- Matsunoshita, Y., Ijiri, K., Ishidou, Y., Nagano, S., Yamamoto, T., Nagao, H., et al., 2011. Suppression of osteosarcoma cell invasion by chemotherapy is mediated by urokinase plasminogen activator activity via up-regulation of EGR1. *PLoS One* 6, e16234.
- Mefford, H. C., Muhle H., Ostertag P., von Spiczak S., Buysse K., Baker, C., et al., 2010. Genome-wide copy number variation in epilepsy: novel susceptibility loci in idiopathic generalized and focal epilepsies. *PLoS Genet.* 6, e1000962. doi: 10.1371/journal.pgen.1000962.
- Miyano, M., Horike, S., Cai, S., Oshimura, M., Kohwi-Shigematsu, T., 2008. DLX5 expression is monoallelic and *DLX5* is up-regulated in the *Mecp2*-null frontal cortex. *J Cell Mol Med* 12, 1188-91
- Molinaro, N., Lizarazu, M., Lallier, M., Bourguignon, M., Carreiras, M., 2016. Out-of-synchrony speech entrainment in developmental dyslexia. *Hum Brain Mapp* 37, 2767-2783. doi:10.1002/hbm.23206.
- Moran, L.V., Hong, L.E., 2011. High vs low frequency neural oscillations in schizophrenia. *Schizophr. Bull.* 37, 659-63.
- Murphy, E., 2015a. Labels, cognomes and cyclic computation: an ethological perspective. *Front Psychol* 6, 715.
- Murphy, E., 2015b. The brain dynamics of linguistic computation. *Front Psychol* 6, 1515.
- Murphy, E., 2016a. The human oscillome and its explanatory potential. *Biolinguistics* 10, 6-20.
- Murphy, E., 2016b. A theta-gamma neural code for feature set composition with phase-entrained delta nestings. *UCL Working Papers in Linguistics* 28: 1-23.
- Nagamani, S.C., Erez, A., Ben-Zeev, B., Frydman, M., Winter, S., Zeller, R., El-Khechen, D., Escobar, L., Stankiewicz, P., Patel, A., Cheung, S.W., 2013. Detection of copy-number variation in *AUTS2* gene by targeted exonic array CGH in patients with developmental delay and autistic spectrum disorders. *Eur J Hum Genet* 21, 343-6. doi: 10.1038/ejhg.2012.157.
- Nakamura, T., Matsumoto, J., Takamura, Y., Ishii, Y., Sasahara, M., Ono, T., et al., 2015. Relationships among parvalbumin-immunoreactive neuron density, phase-locked gamma oscillations, and autistic/schizophrenic symptoms in PDGFR- $\beta$  knock-out and control mice. *PLoS One* 10, e0119258.
- Namiki, K., Nakamura, A., Furuya, M., Mizuhashi, S., Matsuo, Y., Tokuhara, N., et al., 2007. Involvement of p38 $\alpha$  in kainate-induced seizure and neuronal cell damage. *J. Recept. Signal Transduct. Res* 27, 99-111.

- Naqvi, S., Cole, T. y Graham, J. M., Jr., 2000. Cole-Hughes macrocephaly syndrome and associated autistic manifestations. *Am J Med Genet* 94, 149-152.
- Newell, K. A., Karl, T., Huang, X. F., 2013. A neuregulin. 1 transmembrane domain mutation causes imbalanced glutamatergic and dopaminergic receptor expression in mice. *Neuroscience*. 248, 670-80.
- Nguyen, P. T., Nakamura, T., Hori, E., Urakawa, S., Uwano, T., Zhao, J., et al., 2011. Cognitive and socio-emotional deficits in platelet-derived growth factor receptor- $\beta$  gene knockout mice. *PLoS One* 6, e18004.
- Nicodemus, K. K., Elvevåg, B., Foltz, P. W., Rosenstein, M., Diaz-Asper, C., Weinberger, D. R. (2014). Category fluency, latent semantic analysis and schizophrenia: a candidate gene approach. *Cortex* 55, 182-91.
- Ogawa, S., Kwon, C.-H., Zhou, J., Koovakkattu, D., Parada, L. F., Sinton, C., 2007. A seizure-prone phenotype is associated with altered free-running rhythm in Pten mutant mice. *Brain Res*. 1168, 112–123. doi: 10.1016/j.brainres.2007.06.074.
- O’Roak, B. J., Deriziotis, P., Lee, C., Vives, L., Schwartz, J. J., Girirajan, S., Karakoc, E., Mackenzie, A. P., Ng, S. B., Baker, C., Rieder, M. J., Nickerson, D. A., Bernier, R., Fisher, S. E., Shendure, J., Eichler, E. E., 2011. Exome sequencing in sporadic autism spectrum disorders identifies severe de novo mutations. *Nat Genet*. 43, 585-9. doi: 10.1038/ng.835.
- Osbun, N., Li, J., O’Driscoll, M.C., Strominger, Z., Wakahiro, M., Rider, E., et al., 2011. Genetic and functional analyses identify DISC1 as a novel callosal agenesis candidate gene. *Am J Med Genet A* 155A, 1865-76.
- Page, D. T., Kuti, O. J., Prestia, C., Sur, M., 2009. Haploinsufficiency for Pten and serotonin transporter cooperatively influences brain size and social behavior. *Proc Natl Acad Sci U S A* 106, 1989–1994. doi: 10.1073/pnas.0804428106.
- Pal, D. K., Li, W., Clarke, T., Lieberman, P., Strug, L. J., 2010. Pleiotropic effects of the 11p13 locus on developmental verbal dyspraxia and EEG centrottemporal sharp waves. *Genes Brain Behav* 9, 1004-12.
- Paluszkiwicz, S. M., Olmos-Serrano, J. L., Corbin, J. G., Huntsman, M. M., 2011. Impaired inhibitory control of cortical synchronization in fragile X syndrome. *J Neurophysiol* 106, 2264-72. doi: 10.1152/jn.00421.2011.
- Paracchini, S., Diaz, R., Stein, J., 2016. Advances in dyslexia genetics—new insights into the role of brain asymmetries, in: Friedmann, T., Dunlap, J. C., Goodwin, S. F. (Eds.), *Advances in Genetics* 96. Academic Press: London, pp. 53–97. doi:10.1016/bs.adgen.2016.08.003.
- Pearl, P. L., Novotny, E. J., Acosta, M. T., Jakobs, C., Gibson, K. M., 2003. Succinic semialdehyde dehydrogenase deficiency in children and adults. *Ann Neurol*. 54 Suppl 6, S73-80.
- Perovic, A., Janke, V., 2013. Issues in the acquisition of binding, control and raising in high-functioning children with autism. *UCL Work. Papers in Linguistics* 25, 131–143.
- Perovic, A., Modyanova, N., Wexler, K., 2007. Knowledge of c-command and A-movement in children and adolescents with autism and with Asperger syndrome. Paper presented at GALA 2007: Generative Approaches to Language Acquisition, Barcelona, 6–8 September.
- Peters, S.U., Gordon, R.L., Key, A.P., 2015. Induced gamma oscillations differentiate familiar and novel voices in children with MECP2 duplication and Rett syndromes. *J Child Neurol* 30, 145-52.
- Pettigrew, K.A., Frinton, E., Nudel, R., Chan, M.T., Thompson, P., Hayiou-Thomas, M.E., Talcott, J.B., Stein, J., Monaco, A.P., Hulme, C., Snowling, M.J., Newbury, D.F., Paracchini, S., 2016. Further evidence for a parent-of-origin effect at the NOP9 locus on language-related phenotypes. *J Neurodev Disord*. 8, 24. doi: 10.1186/s11689-016-9157-6.



- Pleasure, S. J., Anderson, S., Hevner, R., Bagri, A., Marin, O., Lowenstein, D. H., et al., 2000. Cell migration from the ganglionic eminences is required for the development of hippocampal GABAergic interneurons. *Neuron* 28, 727-40.
- Poeppel, D., 2012. The maps problem and the mapping problem: Two challenges for a cognitive neuroscience of speech and language. *Cogn. Neuropsychol.* 29, 34–55. doi:10.1080/02643294.2012.710600.
- Poelmans, G., Buitelaar, J. K., Pauls, D. L., Franke, B., 2011. A theoretical molecular network for dyslexia: integrating available genetic findings. *Mol Psychiatry* 16,365-82.
- Poitras, L., Yu, M., Lesage-Pelletier, C., Macdonald, R. B., Gagné, J. P., Hatch, G., Kelly, I., Hamilton, S. P., Rubenstein, J. L., Poirier, G. G., Ekker, M., 2010. An SNP in an ultraconserved regulatory element affects *Dlx5/Dlx6* regulation in the forebrain. *Development* 137, 3089-3097
- Poot, M., van't Slot, R., Leupert, R., Beyer, V., Passarge, E., Haaf, T., 2009. Three de novo losses and one insertion within a pericentric inversion of chromosome 6 in a patient with complete absence of expressive speech and reduced pain perception. *Med Genet* 52, 27-30.
- Provenzano, G., Sgadò, P., Genovesi, S., Zunino, G., Casarosa, S., Bozzi, Y., 2015. Hippocampal dysregulation of FMRP/mGluR5 signaling in engrailed-2 knockout mice: a model of autism spectrum disorders. *Neuroreport* 26, 1101-5. doi: 10.1097/WNR.0000000000000477.
- Pun, R.Y., Rolle, I.J., Lasarge, C.L., Hosford, B.E., Rosen, J.M., Uhl, J.D. et al., 2012. Excessive activation of mTOR in postnatally generated granule cells is sufficient to cause epilepsy. *Neuron* 75, 1022-34.
- Radwan, B., Dvorak, D., Fenton, A.A., 2016. Impaired cognitive discrimination and discoordination of coupled theta-gamma oscillations in *Fmr1* knockout mice. *Neurobiol Dis* 88, 125-38. doi: 10.1016/j.nbd.2016.01.003.
- Rakhade, S.N., Shah, A.K., Agarwal, R., Yao, B., Asano, E., Loeb, J.A., 2007. Activity-dependent gene expression correlates with interictal spiking in human neocortical epilepsy. *Epilepsia* 48 Suppl 5, 86-95.
- Rojas, D.C., Maharajh, K., Teale, P., Rogers, S.J., 2008. Reduced neural synchronization of gamma-band MEG oscillations in first-degree relatives of children with autism. *BMC Psychiatry* 8, 66.
- Roll, P., Rudolf, G., Pereira, S., Royer, B., Scheffer, I. E., Massacrier, A., et al., 2006. SRPX2 mutations in disorders of language cortex and cognition. *Hum Mol Genet* 15, 1195-207.
- Roll, P., Vernes, S. C., Bruneau, N., Cillario, J., Ponsole-Lenfant, M., Massacrier, A., et al., 2010. Molecular networks implicated in speech-related disorders: FOXP2 regulates the SRPX2/uPAR complex. *Hum. Mol. Genet.* 19, 4848-60.
- Rolstad, S., Pålsson, E., Ekman, C.J., Eriksson, E., Sellgren, C., Landén, M., 2015. Polymorphisms of dopamine pathway genes *NRG1* and *LMX1A* are associated with cognitive performance in bipolar disorder. *Bipolar Disord* 17, 859-68.
- Royer-Zemmour, B., Ponsole-Lenfant, M., Gara, H., Roll, P., Lévêque, C., Massacrier, A., et al., 2008. Epileptic and developmental disorders of the speech cortex: ligand/receptor interaction of wild-type and mutant SRPX2 with the plasminogen activator receptor uPAR. *Hum Mol Genet* 17, 3617-30.
- Ruiz-Mejias, M., Martinez de Lagran, M., Mattia, M., Castano-Prat, P., Perez-Mendez, L., Ciria-Suarez, L. et al., 2016. Overexpression of *Dyrk1A*, a Down syndrome candidate, decreases excitability and impairs gamma oscillations in the prefrontal cortex. *J Neurosci* 36, 3648-59.
- Saharan, S., Jhaveri, D. J., Bartlett, P. F., 2013. SIRT1 regulates the neurogenic potential of neural precursors in the adult subventricular zone and hippocampus. *J Neurosci Res* 91, 642-59.

- Sakakibara, A., Horwitz, A. F., 2006. Mechanism of polarized protrusion formation on neuronal precursors migrating in the developing chicken cerebellum. *J Cell Sci* 119, 3583-92.
- Sandhu, K.V., Lang, D., Müller, B., Nullmeier, S., Yanagawa, Y., Schwegler, H., Stork, O., 2014. Glutamic acid decarboxylase 67 haplodeficiency impairs social behavior in mice. *Genes Brain Behav* 13, 439-50. doi: 10.1111/gbb.12131.
- Schutte SS., Schutte RJ., Barragan EV., O'Dowd DK. (2016) Model systems for studying cellular mechanisms of SCN1A-related epilepsy. *J Neurophysiol.* 115(4):1755-66. doi: 10.1152/jn.00824.2015.
- Seshadri S., Kamiya A., Yokota Y., Prikulis I., Kano S., Hayashi-Takagi A., Stanco A., Eom TY., Rao S., Ishizuka K., Wong P., Korth C., Anton ES., Sawa A., 2010. Disrupted-in-Schizophrenia-1 expression is regulated by beta-site amyloid precursor protein cleaving enzyme-1-neuregulin cascade. *Proc Natl Acad Sci U S A.* 107, 5622-7. doi: 10.1073/pnas.0909284107.
- Seshadri, S., Faust, T., Ishizuka, K., Delevich, K., Chung, Y., Kim, S. H., et al., 2015. Interneuronal DISC1 regulates NRG1-ErbB4 signalling and excitatory-inhibitory synapse formation in the mature cortex. *Nat. Commun.* 6, 10118.
- Smigiel, R., Cabala, M., Jakubiak, A., Kodera, H., Sasiadek, M. J., Matsumoto, N., et al., 2016. Novel COL4A1 mutation in an infant with severe dysmorphic syndrome with schizencephaly, periventricular calcifications, and cataract resembling congenital infection. *Birth Defects Res Part A Clin Mol Teratol* 106, 304–307. doi:10.1002/bdra.23488.
- Smith, L. E., Barker, E. T., Seltzer, M. M., Abbeduto, L., Greenberg, J. S., 2012. Behavioral phenotype of fragile X syndrome in adolescence and adulthood. *Am J Intellect Dev Disabil* 117, 1-17.
- Soltész, F., Szücs, D., Leong, V., White, S., Goswami, U., Ziegler, J., et al., 2013. Differential entrainment of neuroelectric delta oscillations in developmental dyslexia. *PLoS One* 8, e76608. doi:10.1371/journal.pone.0076608.
- Soorya, L., Kolevzon, A., Zweifach, J., Lim, T., Dobry, Y., Schwartz, L., et al., 2013. Prospective investigation of autism and genotype-phenotype correlations in 22q13 deletion syndrome and SHANK3 deficiency. *Mol Autism* 4, 18. doi: 10.1186/2040-2392-4-18.
- Souchet, B., Guedj, F., Sahún, I., Duchon, A., Daubigney, F., Badel, A., et al., 2014. Excitation/inhibition balance and learning are modified by Dyrk1a gene dosage. *Neurobiol Dis* 69, 65-75.
- Strug, L.J., Clarke, T., Chiang, T., Chien, M., Baskurt, Z., Li, W., et al., 2009. Centrottemporal sharp wave EEG trait in rolandic epilepsy maps to Elongator Protein Complex 4 (ELP4). *Eur J Hum Genet* 17, 1171-81.
- Suárez-Pinilla, P., Roiz-Santiañez, R., Ortiz-García de la Foz, V., Guest, P. C., Ayesa-Arriola, R., Córdova-Palomera, A., et al., 2015. Brain structural and clinical changes after first episode psychosis: Focus on cannabinoid receptor 1 polymorphisms. *Psychiatry Res* 233, 112-9.
- Sundvall, M., Veikkolainen, V., Kurppa, K., Salah, Z., Tvorogov, D., van Zoelen, E. J., et al., 2010. Cell death or survival promoted by alternative isoforms of ErbB4. *Mol Biol Cell* 21, 4275-86. doi: 10.1091/mbc.E10-04-0332.
- Szklarczyk, D., Franceschini, A., Wyder, S., Forslund, K., Heller, D., Huerta-Cepas, J., et al., 2015. STRING v10: protein-protein interaction networks, integrated over the tree of life. *Nucleic Acids Res.* 43, D447-52.
- Tager-Flusberg, H., Paul, R., Lord, C.E., 2005. Language and communication in autism, in: Volkmar, F., Paul, R., Klin, A., Cohen, D. J. (Eds.), *Handbook of Autism and Pervasive Developmental Disorders: Vol. 1. Diagnosis, Development, Neurobiology, and Behavior*, New York, Wiley, pp. 335-364.

- Talkowski, M.E, Mullegama, S.V., Rosenfeld, J.A., van Bon, B.W., Shen, Y., Repnikova, E.A., et al., 2011. Assessment of 2q23.1 microdeletion syndrome implicates MBD5 as a single causal locus of intellectual disability, epilepsy, and autism spectrum disorder. *Am J Hum Genet* 89, 551-63.doi: 10.1016/j.ajhg.2011.09.011.
- Tierney, A. L., Gabard-Durnam, L., Vogel-Farley, V., Tager-Flusberg, H., Nelson, C. A., 2012. Developmental trajectories of resting EEG power: An endophenotype of autism spectrum disorder. *PLoS One* 7, e39127.
- Tilot, A.K., Frazier, T.W. 2nd, Eng, C., 2015. Balancing proliferation and connectivity in PTEN-associated autism spectrum disorder. *Neurotherapeutics* 12, 609-19. doi: 10.1007/s13311-015-0356-8.
- Tosato, S., Bellani, M., Bonetto, C., Ruggeri, M., Perlini, C., Lasalvia, A., et al., 2012. Is neuregulin 1 involved in determining cerebral volumes in schizophrenia? Preliminary results showing a decrease in superior temporal gyrus volume. *Neuropsychobiology* 65, 119-25. doi: 10.1159/000330584.
- Uchino, J., Suzuki, M., Hoshino, K., Nomura, Y., Segawa, M., 2001. Development of language in Rett syndrome. *Brain Dev* 23, S233-S235.
- Uhlhaas, P.J., Haenschel, C., Nikolic, D., Singer, W., 2008. The role of oscillations and synchrony in cortical networks and their putative relevance for the pathophysiology of schizophrenia. *Schizophr Bull* 34, 927-943.
- Urak, L., Feucht, M., Fathi, N., Hornik, K., Fuchs, K., 2006. A GABRB3 promoter haplotype associated with childhood absence epilepsy impairs transcriptional activity. *Hum Mol Genet*15, 2533-41.
- Van Beijsterveldt, C.E., Molenaar, P.C., de Geus, E.J., Boomsma, D.I., 1996. Heritability of human brain functioning as assessed by electroencephalography. *Am J Hum Genet* 58, 562-573.
- Van Bon, B. W., Balciuniene, J., Fruhman, G., Nagamani, S. C., Broome, D. L., Cameron, E., et al., 2011. The phenotype of recurrent 10q22q23 deletions and duplications. *Eur J Hum Genet* 19, 400-8.
- Veenstra-VanderWeele, J., Cook, E. H., 2004. Molecular genetics of autism spectrum disorder. *Mol Psychiatry* 9, 819-832.
- Veyrac, A., Besnard, A., Caboche, J., Davis, S., Laroche, S., 2014. The transcription factor Zif268/Egr1, brain plasticity, and memory. *Prog Mol Biol Transl Sci*122, 89-129.
- Wada, R., 2015. Clinician recasts and production of complex syntax by children with and without specific language impairment. All Graduate Theses and Dissertations. Paper 4277.
- Wang, D., Li, Z., Zhang, Y., Wang, G., Wei, M., Hu, Y., et al., 2016. Targeting of microRNA-199a-5p protects against pilocarpine-induced status epilepticus and seizure damage via SIRT1-p53 cascade. *Epilepsia* 57, 706-16. doi: 10.1111/epi.13348.
- Weiss, L. A., Escayg, A., Kearney, J. A., Trudeau, M., MacDonald, B. T., Mori, M., et al., 2003. Sodium channels SCN1A, SCN2A and SCN3A in familial autism. *Mol Psychiatry* 8, 186-94.
- Wilkinson, C., & Murphy, E. 2016. Joint interventions in autism spectrum disorder: relating oscillopathies and syntactic deficits. *UCL Working Papers in Linguistics* 28: 1-7.
- Williams, S. R., Mullegama, S. V., Rosenfeld, J. A., Dagli, A. I., Hatchwell, E., Allen, W. P., Williams, C. A., Elsea, S. H., 2010. Haploinsufficiency of MBD5 associated with a syndrome involving microcephaly, intellectual disabilities, severe speech impairment, and seizures. *Eur J Hum Genet* 18, 436-41. doi: 10.1038/ejhg.2009.199.
- Xu, T., Stephane, M., Parhi, K.K., 2012. Selection of abnormal neural oscillation patterns associated with sentence-level language disorder in schizophrenia. *Conf Proc IEEE Eng Med Biol Soc* 4923-6. doi: 10.1109/EMBC.2012.6347098.

- Xu, T., Stephane, M., Parhi, K.K., 2013. Multidimensional analysis of the abnormal neural oscillations associated with lexical processing in schizophrenia. *Clin EEG Neurosci* 44, 135-143.
- Yu, W., De Hert, M., Moons, T., Claes, S. J., Correll, C. U., van Winkel, R., 2013. CNR1 gene and risk of the metabolic syndrome in patients with schizophrenia. *J Clin Psychopharmacol* 33, 186-92. doi: 10.1097/JCP.0b013e318283925e.
- Zhan, Y., 2015. Theta frequency prefrontal-hippocampal driving relationship during free exploration in mice. *Neuroscience* 300, 554-65. doi: 10.1016/j.neuroscience.2015.05.063.
- Zhan, Y., Paolicelli, R.C., Sforazzini, F., Weinhard, L., Bolasco, G., Pagani, F., Vyssotski, A.L., Bifone, A., Gozzi, A., Ragozzino, D., Gross, C.T., 2014. Deficient neuron-microglia signaling results in impaired functional brain connectivity and social behavior. *Nat Neurosci* 17, 400-406.
- Zheng, F., Wang, L., Jia, M., Yue, W., Ruan, Y., Lu, T. et al., 2011. Evidence for association between Disrupted-in-Schizophrenia 1 (DISC1) gene polymorphisms and autism in Chinese Han population: a family-based association study. *Behav Brain Funct* 7, 14.
